1 **Polarity protein distribution on the metaphase furrow regulates hexagon**  
2 **dominated plasma membrane organization in syncytial *Drosophila* embryos**

3

4 Bipasha Dey, Debasmita Mitra, Tirthasree Das<sup>1</sup>, Aparna Sherlekar<sup>2</sup>, Ramya Balaji<sup>3</sup> and  
5 Richa Rikhy\*

6

7 **Affiliation and contact information**

8 Biology, Indian Institute of Science Education and Research, Homi Bhabha Road,  
9 Pashan, Pune, 411008, India Phone: +91-20-25908065

10 Present address:

11 1: Present address: Biology, University of Iowa, 246 Biology Building, 129 E. Jefferson  
12 St. Iowa City, Iowa 52242-1324, USA

13 2: Present address: Department of Biology, Stanford University, Stanford, CA, USA

14 3: Present address: Albert-Ludwigs-University Freiburg, Center for Biological Systems  
15 Analysis, Habsburgerstrasse 49, 79104 Freiburg, Germany

16

17 \* To whom correspondence is addressed: [richa@iiserpune.ac.in](mailto:richa@iiserpune.ac.in)

18

19 **Key words:** syncytium; embryo; epithelia; polygon; *Drosophila*; DE-cadherin; Bazooka;  
20 Septin

21 **Running Title:** Polygonality in the *Drosophila* blastoderm

22 **Abbreviations used:** **PM** plasma membrane, **NC** nuclear cycle, **DE-cad** DE-cadherin,

23 **MyoII** Myosin II, **shg** shotgun, **baz** bazooka, **pnut** peanut, **Sqh** Spaghetti Squash

24

25

## 26 **Abstract**

27 Epithelial cells have a polarised distribution of protein complexes on the lateral  
28 membrane and are present as a polygonal array dominated by hexagons. Metazoan  
29 embryogenesis enables the study of temporal formation of the polygonal array and  
30 mechanisms that regulate its distribution. The plasma membrane of the syncytial  
31 *Drosophila* blastoderm embryo is organized as a polygonal array during cortical division  
32 cycles with an apical membrane and lateral furrow in between adjacent nuclei. We find  
33 that polygonal plasma membrane organization arises in syncytial division cycle 11 and  
34 hexagon dominance occurs with increase in furrow length in cycle 12. This is coincident  
35 with DE-cadherin and Bazooka enrichment at edges and the septin, Peanut enrichment  
36 at vertices of the base of the furrow. DE-cadherin depletion leads to loss of hexagon  
37 dominance. Bazooka and Peanut depletion leads to a delay in occurrence of hexagon  
38 dominance from nuclear cycle 12 to 13. Hexagon dominance in Bazooka and Peanut  
39 mutants occurs with furrow extension and correlates with increase in DE-cadherin in  
40 syncytial cycle 13. We conclude that a change in polarity complex distribution leads to  
41 loss of furrow stability thereby changing the polygonal organization of the blastoderm  
42 embryo.

43

## 44 **Highlight Summary for TOC**

45 Metazoan embryogenesis starts with the formation of polygonal epithelial-like cells. We  
46 show that hexagon dominance in polygonal epithelial-like plasma membrane  
47 organization occurs in nuclear cycle 12 in the syncytial blastoderm *Drosophila* embryo.  
48 DE-cadherin and Bazooka distribution along the lateral furrow regulates this hexagon  
49 dominance.

50

## 51 Introduction

52

53 Epithelial cells are organised in a polygonal array in various tissues across  
54 metazoans. Hexagon dominated polygonal packing is a conserved property of all  
55 epithelia across various organisms ranging from the diploblastic *Hydra* to the  
56 triploblastic *Xenopus* (Gibson *et al.*, 2006). The epithelial cell plasma membrane (PM)  
57 has polarized distribution of protein complexes which allows it to segregate into apical,  
58 lateral and basal domains. The Bazooka-Crumbs and Scribble polarity complexes are  
59 localized to the apical and basolateral domains, respectively (Laprise and Tepass,  
60 2011). In columnar epithelial cells, the lateral membrane domain may account for up to  
61 60% of the total cell surface area (Tang, 2017). The lateral membrane domains of  
62 neighbouring cells adhere to each other with the help of various junctional complexes,  
63 thus, contributing to the epithelial cell height. The sub-apical adherens junctions,  
64 comprising the E-cadherin plays a significant role in lateral membrane adhesion.  
65 Asymmetric distribution of these polarity complexes is important for cell shape, tissue  
66 integrity and tissue remodelling (Bilder and Perrimon, 2000; Hayashi and Carthew,  
67 2004; Letizia *et al.*, 2013).

68 Hexagon dominance, a key feature of several epithelia, has been seen to evolve  
69 over developmental stages. For example, in the wing disc of *D. melanogaster*, there is  
70 an increase in the percentage of hexagons from 60% to 80% from larval to pupal  
71 stages, although the distribution is hexagon dominated from the very beginning  
72 (Classen *et al.*, 2005; Sánchez-Gutiérrez *et al.*, 2013). Various molecular and physical  
73 factors influence polygonal distribution. Most theoretical models use surface free energy  
74 minimization as the constraint that leads to hexagonal packing. Surface energy  
75 minimization for a group of epithelial cells is a cumulative result of minimizing the  
76 surface area of each cell exposed to the surrounding while maximizing contacts  
77 between them, similar to molecules in a fluid bulk (Lecuit and Lenne, 2007). One of the  
78 most common molecular factors regulating this distribution is the junctional molecule E-  
79 cadherin (E-cad). DE-cad (*Drosophila* E-cad) stabilization due to decrease in turnover in  
80 endocytic mutants results in decreasing the frequency of hexagons in *Drosophila* wing  
81 discs. This E-cad recycling is shown to be regulated by planar cell polarity (PCP)

82 proteins and the loss of PCP proteins, in turn, shows a decrease in the number of  
83 hexagons in the epithelium (Classen *et al.*, 2005; Iyer *et al.*, 2019). In animal cell  
84 cultures, it has been observed that loss of ROCK1 and ROCK2, which are important  
85 regulators of Myosin II activity, result in shortening of lateral cell height and decrease in  
86 the percentage of hexagons (Kalaji *et al.*, 2012). Thus, one of the by-products of polarity  
87 might be stability of the lateral membrane and hexagon dominance.

88 Metazoan embryogenesis shows the onset of epithelial-like polarity and  
89 formation of a polygonal array (Nance, 2014). A systematic analysis of onset of  
90 polygonal packing and the factors that determine this in embryogenesis has not been  
91 characterized thus far. In this study we use the syncytial *Drosophila* blastoderm embryo  
92 to characterize the temporal onset of polygonal packing and the role of polarity proteins  
93 in regulating its dynamics. Nuclear division cycles (NC) 1-9 occur deep in the interior of  
94 the *Drosophila* syncytial blastoderm embryo followed by nuclear migration to cortex  
95 during NC10 (Foe and Alberts, 1983; Miller *et al.*, 1985). The arrival of the nuclei can be  
96 seen as buds called caps at the cortex (Foe and Alberts, 1983; Miller *et al.*, 1985). In  
97 terms of morphological features, the caps are enriched in multiple villi-like projections  
98 (Turner and Mahowald, 1976; Miller *et al.*, 1985; Karr and Alberts, 1986; Mavrikis *et al.*,  
99 2009). Nuclear division cycles 11-13 occur beneath the cortex and these projections are  
100 reduced at metaphase of each cortical nuclear cycle when the caps are flattened  
101 (Turner and Mahowald, 1976). Complete cells that are epithelial in nature are formed in  
102 NC14 by extension and polarization of the plasma membrane in a process called  
103 cellularization (Lecuit, 2004).

104 The syncytial *Drosophila* embryo also shows asymmetric distribution of various  
105 polarity and cytoskeletal proteins. To begin with, the *Drosophila* embryo is cortically  
106 uniform at the pre-blastoderm stage. The first cortical differentiation occurs during NC10  
107 where the cortex is divided into two domains during interphase; the cap and intercap  
108 regions. The cap region is enriched in F-actin and actin associated proteins like Arp2/3,  
109 SCAR, Moesin, ELMO, Sponge and  $\alpha$ -spectrin, while the intercap region is marked by  
110 Myosin II, Toll and Slam. The PM begins to be organized as a polygonal array and  
111 during metaphase, the cortex is further segregated into three domains; apical, lateral  
112 and basal domain. In the case of a syncytial cell, a complete basal PM is missing and

113 basal domain refers to the furrow tip. The apical-lateral region is occupied by Canoe,  
114 Peanut (Pnut), Scrambled, DE-cad, Bazooka (Baz); lateral by Dlg and Toll; and the  
115 furrow tip shows enrichment of PatJ, Amphiphysin, Anilin, Diaphanous and Syndapin  
116 (Pesacreta *et al.*, 1989; Thomas and Williams, 1999; Foe *et al.*, 2000; Stevenson *et al.*,  
117 2002; Zallen *et al.*, 2002; Mavrakakis *et al.*, 2009; Rikhy *et al.*, 2015; Sherlekar and Rikhy,  
118 2016; Schmidt and Grosshans, 2018; Schmidt *et al.*, 2018).

119 The syncytial *Drosophila* blastoderm embryo already shows molecular and  
120 morphological asymmetries in the PM along with a polygonal array but how these  
121 regulate the distribution and dynamics of the polygonal array remain to be investigated.  
122 Here, we assess the role of polarity proteins in regulating the polygonal PM  
123 organization. We find that the PM of the embryo is organised as a hexagon dominated  
124 polygonal array in NC12 with DE-cad and Baz enriched at the edges and Peanut  
125 enriched at vertices. DE-cad, Baz and Pnut are enriched at the basal part of the furrow  
126 membrane. DE-cad depletion leads to loss of hexagon dominance and a short furrow  
127 while Baz and Pnut depletion results in a delay in the onset of hexagon dominance.

128

## 129 **Results**

130

### 131 **Onset of hexagon dominated plasma membrane architecture occurs during** 132 **nuclear cycle 12 in syncytial *Drosophila* blastoderm embryos**

133 Epithelial cells are seen as polygonal cells with pentagons, hexagons and  
134 heptagons occurring at high frequencies in various tissues all across the metazoan  
135 animal kingdom (Gibson *et al.*, 2006). Hexagon dominance arises as a result of energy  
136 minimization while maximizing the area of contact between adjacent cells (Gibson *et al.*,  
137 2006). To assess the time at which this comes about during the syncytial division  
138 cycles, we performed live imaging of tGPH expressing embryos. tGPH marks the  
139 phospholipid PIP3 enriched PM regions and labelled the PM uniformly in the syncytial  
140 *Drosophila* embryo (Britton *et al.*, 2002; Sherlekar and Rikhy, 2016). We used the  
141 packing analyzer software to estimate the polygon distribution from metaphase of each  
142 NC (Figure 1A).

143 The nucleo-cytoplasmic domains of the syncytial *Drosophila* embryo have  
144 decreased diffusion of organelles and PM proteins across adjacent domains (Frescas *et*  
145 *al.*, 2006; Mavrakis *et al.*, 2009). Hence we refer to these as “syncytial cells”. The  
146 syncytial cells were relatively far apart in metaphase of NC10 and seen as separated  
147 caps at the embryo surface (Figure 1B, Movie S1). The furrow length increases during  
148 each cycle from NC11 to 13 from interphase to metaphase in between adjacent nucleo-  
149 cytoplasmic domains and it reaches a maximum at metaphase during syncytial cycle 13  
150 (Foe and Alberts, 1983; Holly *et al.*, 2015; Xie and Todd Blankenship, 2018). The PM  
151 was organized into a polygonal array for the first time in *Drosophila* embryo  
152 development in NC11 (Figure 1B). The PM in the polygonal array in NC13 and 14 was  
153 more taut as compared to NC11 and 12. NC11 at metaphase showed almost equal  
154 numbers of pentagons and hexagons in the polygonal array. The polygonal array then  
155 became dominated by hexagons followed by pentagons in NC12. This hexagon  
156 dominance persisted in NC13-14 (Figure 1C-D). While observing the onset of formation  
157 of the polygonal array, we noted that edges formed before vertices in NC11 (Figure 1E).

158 The furrow length in nuclear division cycles increases from NC11 to 13 (Holly *et*  
159 *al.*, 2015). We found that the furrow length was approximately 7  $\mu\text{m}$  in NC11, 9  $\mu\text{m}$  in  
160 NC12 and 11  $\mu\text{m}$  in NC13 with tGPH (Figure 2). Polygonal architecture is also visible at  
161 lower furrow lengths in each NC. We chose to analyze the polygon distribution at a  
162 lower length of approximately 6.5  $\mu\text{m}$  in NC12 and NC13 when polygonal architecture  
163 was clearly visible across the embryo. We found that at this furrow length in NC12,  
164 pentagons were dominant, whereas in NC13 hexagons were dominant (Figure S1A-C).  
165 These data together show that epithelial-like hexagon dominance first occurs at NC12  
166 at longer furrow lengths in metaphase, even before complete cells are formed in the  
167 syncytial division cycles.

168

### 169 **Analysis of asymmetric distribution of DE-cadherin, Bazooka and Peanut in the** 170 **plasma membrane of the *Drosophila* syncytial blastoderm**

171 Since the syncytial embryo PM was organized into epithelial-like polygonal array  
172 starting from NC11 and became hexagon dominated in NC12, we tested if polarity  
173 proteins were progressively enriched in the lateral furrows in NC11-13. DE-cad and Baz

174 have been found in the syncytial furrow and form apical spot junctions in cellularization  
175 (Harris and Peifer, 2004). In order to characterize the temporal distribution of DE-cad  
176 and Baz as compared to tGPH in NC11-13, we performed live imaging of embryos  
177 expressing DE-cad-GFP (Huang et al., 2009) and Baz-GFP (Benton and Johnston,  
178 2003). The epithelial PM shows a distinct distribution of proteins along tricellular  
179 junctions, which function in sealing the intercellular space (Ikenouchi et al., 2005;  
180 Schulte et al., 2003) as well as along the lateral domain. Also we observed a correlation  
181 between hexagon dominance in NC12 with increased furrow length (Figure S1). We  
182 therefore quantified the intensity of the fluorescently tagged DE-cad and Baz and the  
183 PM marker tGPH in edges and vertices of the polygonal array along with different  
184 optical sections in the length of metaphase furrow in NC11-13 (Figure 2A-C). The  
185 intensities obtained were plotted as a fold change with respect to the apical section of  
186 NC11 (Figure 2E-G). tGPH was distributed evenly across the furrow in edges and  
187 vertices and marked the entire length of the furrow in the lateral views (Figure 2A-A'',E-  
188 E'').

189 We found that DE-cad was uniform across edges and vertices in NC11 and 12  
190 and was enriched at edges in NC13 (Figure 2B-B'', F-F''). DE-cad was present along the  
191 entire metaphase furrow in NC11-12, while in NC13 it was enriched in the basal part of  
192 the furrow from 7-10  $\mu\text{m}$  (Figure 2B-B'', F-F'').

193 Baz-GFP was present along the entire membrane with an enrichment at edges in  
194 NC12-13. Baz was enriched at the furrow between 2-5  $\mu\text{m}$  in NC11 and towards the  
195 basal part of the furrow from 4-6  $\mu\text{m}$  in NC12 and from 6-10  $\mu\text{m}$  in NC13 (Figure 2C-C'',  
196 G-G'').

197 The septin family proteins Pnut, Sep1 and Sep2 were studied because Pnut is  
198 present at the furrow in syncytial stages and functions in actin organization and furrow  
199 extension (Rosalind-Silverman, 2008). Pnut-mCherry (Guillot and Lecuit, 2013) was  
200 used to assess the distribution of Pnut on the membrane in edges and vertices and  
201 along the length of the furrow across the syncytial cycles. Pnut was present throughout  
202 the membrane and was enriched at vertices from NC11 onwards. Pnut was  
203 concentrated towards the basal part of the furrow at 3-5  $\mu\text{m}$  in NC11, 5-8  $\mu\text{m}$  in NC12  
204 and 5-10  $\mu\text{m}$  in NC13 (Figure 2D-D'', H-H'').

205 We estimated the fold change of total DE-cad, Baz and Pnut fluorescence on the  
206 PM across the syncytial cycles as compared to NC11. We found that the total intensity  
207 of DE-cad along the metaphase furrow in NC13 as compared to NC12 increased  
208 significantly greater than that of Baz and Pnut (Figure 2F" compared to 2G"-H"). This  
209 variation in distribution across the syncytial cycles may have implications on the role of  
210 these proteins in the formation and stabilization of furrows and polygonal architecture.

211 We assessed the presence of polarity proteins Crumbs, Stardust, Dlg, Scrib and  
212 Patj by immunostaining. Crumbs and Stardust were not expressed in the early embryo  
213 (data not shown). Consistent with previous observations, Dlg as present along the  
214 furrow membrane while Patj was enriched at the tip (Harris and Peifer, 2004; Mavrakis  
215 *et al.*, 2009)(Figure S2A-D). We also found Scrib to be present along the furrow as  
216 reported earlier (Schmidt *et al.*, 2018). Edge enrichment was also seen for Dlg and  
217 vertex enrichment was observed in Sep1 and Sep2 (Figure S2E-H).

218 The syncytial PM showed asymmetries in the planar axis of the polygon at edges  
219 (DE-cad, Baz) and vertices (Pnut) and enrichment of proteins along the base of lateral  
220 furrow from NC11-13 (Figure 2I-J).

221

## 222 **Bazooka membrane recruitment is important for Peanut distribution in the** 223 **syncytial *Drosophila* embryo**

224 To dissect the role of Baz, Pnut and DE-cad during the onset of hexagon  
225 dominance, we investigated their loss of function effects in the syncytial cycles. We  
226 assessed the role of Baz by maternally expressing *baz* RNAi (*baz*<sup>Δ</sup>) (see *material and*  
227 *methods* for details). Baz protein levels as assessed by an antibody against the N-  
228 terminus of the protein were lowered in these embryos as compared to control (Wodarz  
229 *et al.*, 1999). Interestingly, with the knockdown of this edge enriched protein, Pnut was  
230 also lowered (Figure 3A-B) suggesting a possible role of Baz in stabilization of Pnut on  
231 the membrane. However, the F-actin remained unaltered and appeared similar to  
232 control embryos (Figure 3A'-B'). As Baz function is important for formation of spot  
233 adherens junctions in cellularization (Harris and Peifer, 2004), we checked DE-cad  
234 distribution in *baz*<sup>Δ</sup> embryos and found that its distribution was similar to controls in  
235 NC13 (Figure 3B').



236 To determine the effect of loss of Pnut on Baz and DE-cad localization, we  
237 generated germline clone embryos of null mutants of Pnut (*pnut*<sup>XP</sup>) (Neufeld and Rubin,  
238 1994). With depletion of Pnut from *pnut*<sup>XP</sup> embryos, Baz and DE-cad localization  
239 remained unaffected (Figure 3A,C,A',C'). Thus, Pnut was not important for Baz  
240 localization on the syncytial PM. Notably, Baz and Pnut depletion did not affect DE-cad  
241 distribution on the syncytial PM.

242 To verify if Pnut localization on the syncytial PM depended on Baz association to  
243 the syncytial PM, we maternally overexpressed truncated transgenes of Baz containing  
244 the N terminus oligomerization domain or the C terminus phospholipid membrane  
245 binding domain. A GFP tagged C-terminal truncation mutant of Baz, Baz $\Delta$ 969-1464-  
246 GFP, which is defective in PM recruitment (Krahn et al., 2010) was expressed  
247 maternally in the presence of wild-type protein. Baz $\Delta$ 969-1464-GFP showed a cytosolic  
248 pattern in metaphase of NC13. Baz antibody staining against the N-terminus of the  
249 protein showed an increased cytosolic distribution and a diffused membrane localization  
250 as compared to controls (Figure 3D-E). Since Baz is seen to form oligomers *in vivo*  
251 (Benton and St Johnston, 2003), we speculate that the N-terminal domain oligomerizes  
252 in this overexpression mutant, leading to the reduction of Baz from PM and an increase  
253 in the cytosol in addition to the attenuated levels of Pnut. On the other hand, when a  
254 GFP tagged Baz N-terminal truncation mutant, Baz $\Delta$ 1-904-GFP was maternally  
255 overexpressed, both the truncated and endogenous Baz could localize on the  
256 membrane. Pnut distribution was weaker than that seen in controls but it was present  
257 on the membrane (Figure 3D,F). Thus, the C-terminal domain of Baz was important not  
258 only for its own recruitment on the PM but also for Pnut membrane localization.

259

### 260 **Bazooka and Peanut depletion leads to delayed onset of hexagon dominance and** 261 **short furrows in the syncytial blastoderm embryo**

262 We analyzed polygonal distribution in Baz and Pnut knockdown embryos, by live  
263 imaging mutant embryos expressing tGPH and with phalloidin staining. We found that  
264 *baz*<sup>j</sup> and *pnut*<sup>XP</sup> (Figure 4A-B,E) showed a significant increase in the frequency of  
265 pentagons and loss of hexagon dominance in NC12. However, the hexagon dominance  
266 was seen similar to controls in NC13 (Figure 4C-D,E). Overexpression of the Baz

267 oligomerization domain (Baz $\Delta$ 969-1464-GFP) that lowered Baz and depleted Pnut from  
268 the membrane also showed loss of hexagon dominance at NC12 which recovered at  
269 NC13 (Figure S3A-D).

270 Since we found increased localization of Baz and Pnut at the base of the  
271 metaphase furrow, we estimated the furrow length in *baz*<sup>j</sup> and *pnut*<sup>i</sup> embryos. Pnut loss  
272 is known to result in shorter metaphase furrows (Rosalind-Silverman, 2008; Sherlekar  
273 and Rikhy, 2016). *baz*<sup>j</sup> and *pnut*<sup>i</sup> embryos showed a marginal but significant decrease in  
274 furrow lengths in NC11-13 as compared to controls (Figure 4F-G, Movie S2-S3). We  
275 also estimated the furrow ingression rates of the knockdowns and observed similar  
276 rates of ingression in both mutants as compared to the control even though the final  
277 length was slightly decreased (Figure S3E). The double mutant of Baz and Pnut  
278 showed a loss of furrow length like the single mutant and this was also decreased to a  
279 significant but small extent (Figure S3F-G). Thus, Baz and Pnut mutant embryos  
280 showed a marginal decrease in furrow lengths metaphase of the NC11-13 and a delay  
281 in onset of hexagon dominance.

282

### 283 **DE-cadherin depletion leads to loss of hexagon dominance and severely** 284 **disrupted furrow extension**

285 We assessed DE-cad mutant embryos for localization of Baz and Pnut along with  
286 polygon onset in the syncytial cycles. *shg* RNAi (*shg*<sup>j</sup>) was maternally expressed in  
287 embryos (see Materials and Methods for details). As expected, embryos developing to  
288 syncytial stages had reduced DE-cad staining (Figure 5A-B). The *shg*<sup>j</sup> embryos had  
289 diffuse F-actin distribution as seen by phalloidin staining when compared to sharp  
290 staining in controls. Baz and Pnut were present on the furrow membrane in *shg*<sup>j</sup>.  
291 However, Pnut was spread more evenly and not enriched at the vertex and Baz staining  
292 was more diffuse as compared to controls (Figure 5A'-B'). DE-cad distribution of the  
293 membrane was therefore important for Baz and Pnut localization on the furrow  
294 membrane.

295 To assess the effect of DE-cad loss on polygonal shape, we quantified the  
296 polygonal distribution from metaphase of *shg*<sup>j</sup> live movies obtained with tGPH. Live  
297 imaging of *shg*<sup>j</sup> embryos with tGPH showed defects during syncytial division cycles. *shg*<sup>j</sup>

298 embryos showed loss of hexagon dominance at NC12. *shg*<sup>j</sup> expressing embryos did not  
299 show a significant difference between pentagons and hexagons in NC13. Thus, unlike  
300 *baz*<sup>j</sup> and *pnut*<sup>j</sup> embryos, loss of hexagon dominance persisted in NC13 in *shg*<sup>j</sup> (Figure  
301 5C-G). *shg*<sup>j</sup> expressing embryos also showed ruffled membranes as opposed to the taut  
302 and sharp membranes in the controls. The furrow membrane showed a diffuse tGPH  
303 signal which was spread over a larger area as compared to control embryos (Figure  
304 S3H-I, Movie S4). Therefore, DE-cad loss affected polygon distribution more than Baz  
305 and Pnut.

306 Finally, we estimated furrow length in *shg*<sup>j</sup> embryos with tGPH and found it to be  
307 considerably shorter than the control and shorter on average than *baz* and *pnut*  
308 knockdowns (Figure 5H-I compared to 4F-G). Taken together, DE-cad plays a  
309 significant role in maintaining hexagon dominance. This occurs by its known function of  
310 mediating adhesion between adjacent PM lateral domains and in the case of the  
311 syncytial embryo, adjacent furrow membranes together for the formation of edges.

312

### 313 **Recovery of hexagon dominance in Bazooka and Peanut mutant embryos occurs** 314 **during syncytial cycle 13 with furrow extension**

315 Furrows increase in length from interphase to metaphase in each NC (Xie and  
316 Todd Blankenship, 2018). Baz and Pnut depletion resulted in delayed hexagon  
317 dominance and marginally short furrows. DE-cad depletion, on the other hand, had loss  
318 of hexagon dominance and gave shorter furrows than Baz and Pnut loss. Since Baz  
319 and Pnut mutant embryos showed a recovery of hexagon dominance in NC13, we  
320 estimated whether hexagon dominance occurred as a function of furrow length in NC13.  
321 We plotted the distribution of polygons and ratio of pentagons to hexagons in controls,  
322 Baz and Pnut mutant embryos with respect to furrow length. For control embryos, we  
323 found that hexagon dominance was present as soon as the polygonal array was  
324 established in NC13 at 6.5  $\mu\text{m}$  and remained the same until metaphase (Figure 6A-F).  
325 Interestingly, Baz and Pnut mutants showed pentagon dominance at the start of NC13  
326 in interphase and showed hexagon dominance at the maximum furrow length in NC13  
327 (Figure 6A-F). In summary, the recovery to hexagon dominance in NC13 in both Baz  
328 and Pnut knockdown embryos was furrow length dependent. It is possible that

329 increased recruitment of polarity complexes occurred at increased furrow length and  
330 this allowed the membranes to stabilize to give rise to hexagon dominance.

331

### 332 **Occurrence of hexagon dominance in Bazooka and Peanut mutant embryos in** 333 **NC13 is coincident with increase in DE-cadherin**

334 Apical cap remodelling in the syncytial division cycles occurs with the help of  
335 regulators of actin remodelling. The actin caps are formed in interphase of syncytial  
336 division cycles and expand to form furrows in prophase and metaphase. Arp2/3 activity  
337 is needed for cap expansion followed by Myosin II which leads to cap buckling for the  
338 formation of furrows (Stevenson *et al.*, 2002; Zhang *et al.*, 2018). Also Anillin-Pnut  
339 networks have been found to play a redundant function to Myosin II in furrow initiation  
340 (Zhang *et al.*, 2018). Septins have also been found crucial for bundling actin into curved  
341 bundles in cellularization (Mavrakis *et al.*, 2014). Our data shows that furrow formation  
342 is affected in embryos depleted of DE-cad possibly due to lack of adhesion and  
343 stabilization of furrows. We find that loss of DE-cad leads to increase in pentagons.  
344 Thus, it is possible that change in levels of Myosin II and/or DE-cad levels at the furrow  
345 leads to recovery of hexagon dominance in Baz and Pnut mutant embryos.

346 We hence imaged Myosin II and DE-cad dynamics in Baz, Pnut and DE-cad  
347 depleted embryos. For imaging Myosin II we expressed the fluorescently tagged Myosin  
348 light chain subunit Spaghetti Squash (Sqh) tagged with either GFP or mCherry (Royou  
349 *et al.*, 2004; Martin *et al.*, 2009). As reported previously, we found that Myosin II was  
350 enriched on the PM in interphase and was depleted from the PM in metaphase (Figure  
351 7A-C). DE-cad was present on the membrane in both interphase and metaphase of  
352 NC11 and 12. Increased activation of Myosin II on increasing RhoGEF2 activity leads to  
353 increased recruitment of fluorescently tagged Sqh on the membrane (Izquierdo *et al.*,  
354 2018). We analyzed the Myosin II and DE-cad levels by imaging Sqh-mCherry; DE-cad-  
355 GFP in Baz and Pnut depleted embryos and Myosin II levels by imaging Sqh-GFP in  
356 DE-cad depleted embryos. We estimated the total Sqh-mCherry or Sqh-GFP  
357 fluorescence on the furrow as a ratio to the neighboring cytoplasm. We did not find a  
358 significant difference in interphase in Baz, Pnut and DE-cad depleted embryos as  
359 compared to controls (Figure 7D-E,D'-E',G-H). Sqh was decreased from the membrane

360 in Baz, Pnut and DE-cad depleted embryos in metaphase similar to controls (data not  
361 shown).

362 DE-cad levels were next estimated in Baz and Pnut mutant embryos by  
363 expressing DE-cad-GFP in these mutant embryos. We found that Baz and Pnut  
364 embryos did not show a significant change in DE-cad levels as compared to controls in  
365 NC12. We next represented the total DE-cad fluorescence in NC13 as a ratio to NC12  
366 and found that there was a distinct increase in DE-cad levels in Baz and Pnut depleted  
367 embryos as compared to controls (Figure 7F,F',I).

368 In summary, we observe that loss of DE-cad leads of loss of hexagon dominance  
369 (Figure 5) and increase of DE-cad in Baz and Pnut depleted embryos correlates with  
370 occurrence of hexagon dominance during NC13 (Figure 4,7).

371

## 372 Discussion

373 In this study we show that hexagon dominated plasma membrane organization  
374 occurs in the syncytial *Drosophila* blastoderm embryo from NC12 onwards. Pentagons  
375 and hexagons are equally likely in NC11 when edges first form and hexagons are  
376 present at almost double the number of pentagons from NC12 onwards. Since the  
377 syncytial cycles do not have a complete basal domain the mechanisms that regulate  
378 this hexagon dominance are likely to be present on the lateral furrow. We have  
379 characterized the role of Baz, Pnut and DE-cad proteins in regulation of the lateral  
380 furrow length in the syncytial embryo. This analysis reveals furrow and polygon  
381 distribution phenotypes in two categories: 1) DE-cad depleted embryos have short  
382 furrows and loss of hexagon dominance; 2) Baz and Pnut depleted embryos have only  
383 slightly short furrows and delay in hexagon dominance. Whereas in the control  
384 embryos, hexagon dominance appears in NC12 at longer furrow lengths, hexagon  
385 dominance appears in Baz and Pnut mutant embryos in NC13 with increase in furrow  
386 lengths and coincident with an increase in DE-cad levels. These studies therefore  
387 reveal the combination of polarity proteins necessary to give rise to a *de novo* hexagon  
388 dominant epithelial-like PM in the syncytial *Drosophila* embryo (Figure 8).

389 DE-cad loss decreased but did not completely abolish lateral furrows. If this is the  
390 major protein responsible for stabilization of adhesion of furrow membranes of adjacent

391 syncytial cells, we should have obtained a phenotype of complete loss of furrow but we  
392 only saw a severe reduction in furrow length. We argue that this could be due to inability  
393 to deplete DE-cad completely with the RNAi strategy. Also it could be due to the  
394 presence of other proteins that are responsible for keeping the furrow membrane  
395 adhered to each other. We tested for the occurrence of other transmembrane proteins  
396 such as Crumbs, Neuroglian and Neurexin (Harris and Peifer, 2004; Laprise *et al.*,  
397 2009) and did not find them to be present on the furrow in syncytial embryos. Future  
398 analysis of more such cadherin-like adhesion molecules such as Echinoid may be  
399 useful in this direction (Wei *et al.*, 2005).

400         Increase in DE-cad is known to occur due to the loss of endocytosis and  
401 recycling in the *Drosophila* wing disc epithelium (Classen *et al.*, 2005; Iyer *et al.*, 2019).  
402 Dynamin dependent endocytosis also regulates the syncytial furrow dynamics and DE-  
403 cad on the furrow membrane (Rikhy *et al.*, 2015). It is possible that loss of Baz and Pnut  
404 on the syncytial furrow leads to increase in DE-cad on the furrow in NC13 due to loss of  
405 recycling. Further analysis on changes in membrane trafficking on the PM on the loss of  
406 a polarity proteins will enable ascertaining decreased endocytosis in Baz and Pnut  
407 depleted embryos as a mechanism for reversal of hexagon dominance in Baz depleted  
408 embryos.

409         Baz and DE-cad play significant roles in initiating the polarity program in different  
410 tissues. Baz initiates adherens junction polarity in *Drosophila* cellularization and  
411 gastrulation (Müller and Wieschaus, 1996; Harris and Peifer, 2004; (Pilot *et al.*, 2006))  
412 but is dispensable in follicle epithelial cells (Shahab *et al.*, 2015). Conversely, in  
413 mesoderm invagination, apical movement of DE-cad precedes Baz relocation and thus,  
414 the asymmetry in DE-cad distribution here does not depend on Baz (Weng and  
415 Wieschaus, 2017). This is similar to mammalian cells where E-cad is recruited to  
416 contact points before Baz (Coopman and Dijane, 2016). This suggests that depending  
417 on the tissue type or developmental stage, the relative importance of Baz and E-cad in  
418 initiating polarity may change. We show that DE-cad is important for distribution of Baz  
419 and Pnut to the furrow. As mentioned above, we were unable to identify the presence of  
420 other transmembrane junctional proteins, and in such a scenario, DE-cad is likely to  
421 assume a significant role in furrow formation in the *Drosophila* syncytial blastoderm

422 embryo.

423 Asynchronous cell division in *Drosophila* wing disc epithelia is one of the  
424 mechanisms that gives rise to a hexagon dominated and energy minimized network  
425 (Gibson et al., 2006). It is of interest to note that synchronous division in the syncytial  
426 *Drosophila* blastoderm embryo also reaches a similar hexagon dominance in NC12.  
427 Decreased number of edges in the polygonal array is a favorable state for cell neighbor  
428 exchanges and gives rise to a soft network (Farhadifar et al., 2007). The increase in  
429 pentagons in *baz* and *pnut* mutants indicates a similar transition to a soft network  
430 possibly due to decreased stabilization of the furrow even in the presence of DE-cad  
431 and furrow length. The contacts in the Baz and Pnut mutant embryos are likely to  
432 facilitate neighbor exchanges. With increase in DE-cad on the furrow in NC13, these  
433 may allow for conversion back to hexagon dominated state by formation and  
434 stabilization of one additional edge and vertex. Thus, future analysis of change in furrow  
435 tension in various genetic backgrounds along with mathematical modelling will reveal  
436 the mechanisms that drive shape morphogenesis in *Drosophila* syncytial blastoderm  
437 embryo.

438

439

#### 440 **Acknowledgements**

441 We thank Mandar Inamdar (IIT, Bombay, India) for discussions on this work. We  
442 thank the RR lab members for comments and discussion on the data in the manuscript.  
443 We thank the *Drosophila* and Microscopy facilities at IISER, Pune, India for help with  
444 stocks and microscopy for the experiments. We thank Benoit Aigouy for sharing the  
445 Packing analyzer software. We thank Andreas Wodarz for Bazooka antibody and  
446 Bazooka domain truncation stocks. We thank Manos Mavrikis for *peanut* mutant stocks  
447 and Sep1 and 2 antibodies. BD, DM, and AS thank CSIR for graduate fellowship. RR  
448 thanks IISER, Pune, DBT and DST for funding to the lab. RB and TD thank KVPY for  
449 fellowship.

450

#### 451 **Figure Legends:**

452

453 **Figure 1**

454 **Hexagon dominated plasma membrane organization emerges at NC12**

455 **(A)** Schematic showing the syncytial *Drosophila* blastoderm embryo in interphase being  
456 imaged by an objective below in an inverted microscope. The zoomed inset shows a  
457 syncytial cell in metaphase turned 180 degrees with the PM on top. A cross-section of  
458 this view across the metaphase furrow at the bottom (dotted line) shows polygonal  
459 distribution of the cells. These were analyzed by the packing analyzer software for  
460 obtaining the polygon distribution onset across the NC10-14. Grazing sections of tGPH  
461 expressing embryos from NC10-14 at metaphase, tGPH labels the entire membrane in  
462 NC10-13 and enters the nucleus in NC14 in addition to being at the membrane **(B)**.  
463 Colour-coded polygon rendering using the packing analyzer software **(C)**. Quantitative  
464 analysis of polygon distribution in NC11-14 (n= 20-60 cells from NC11-14 per embryo, 4  
465 embryos) **(D)**.

466 **(E)** Edge formation occurs before vertex formation. Grazing sections of tGPH  
467 expressing embryos at NC11 from interphase to metaphase. The arrow shows the  
468 formation of edges first, followed by the formation of vertices.  
469 Data is represented as mean $\pm$  SD. NC11 polygon distribution is significantly different  
470 from NC12-14 and NC12-14 are similar to each other with hexagon dominance,  
471 Multinomial chi square test (\*\*\*) $p < 0.001$ ). Two tailed, unpaired, Student's t test is used  
472 for comparing hexagons versus pentagons. Scale bar: 5  $\mu$ m

473

474 **Figure 2**

475 **DE-cad, Baz and Pnut show polarized distribution in the syncytial cells**

476 **(A-D)** Distribution of tGPH (**A**: NC11, **A'**: NC12 and **A''**: NC13), DE-cad-GFP (**B**: NC11,  
477 **B'**: NC12 and **B''**: NC13), Baz-GFP (**C**: NC11, **C'**: NC12 and **C''**: NC13) and Pnut-  
478 mCherry (**D**: NC11, **D'**: NC12 and **D''**: NC13) in grazing and sagittal views in syncytial  
479 NC11-13. The Jet rainbow scale from ImageJ is used to show fluorescent intensities.  
480 tGPH labels the entire PM, DE-cad is enriched at edges in NC13 (**B''** insets show  
481 zoomed in images), Baz is enriched at edges NC11 onwards while Pnut is enriched on  
482 the vertex NC12 onwards (**C''-D''** insets show zoomed in images).

483 **(E-H)** Quantification of intensities normalized to the apical section of NC11 in edges



484 (black) and vertices (grey) along the metaphase furrow length for tGPH (**E**: NC11, **E'**:  
485 NC12, **E''**: NC13), DE-cad-GFP (**F**: NC11, **F'**: NC12, **F''**: NC13), Baz-GFP (**G**: NC11,  
486 **G'**: NC12, **G''**: NC13') and Pnut-mCherry (**H**: NC11, **H'**: NC12, **H''**: NC13) in NC11-13  
487 (n=3 embryos each). The total Baz-GFP and tGPH fluorescence on the furrow shows  
488 1.5 fold enrichment on the membrane from NC11-12, the total Pnut-mCherry and DE-  
489 cad-GFP fluorescence shows 2 fold enrichment from NC11-12. The total DE-cad-GFP  
490 shows 3 fold enrichment on the lateral membrane at NC13 while others do not show  
491 further increase. The significance bars along the length of the furrow show significant  
492 enrichment on the edge in the basal regions of the furrow for DE-cad-GFP in NC13, for  
493 Baz-GFP in NC11-13 and on the vertex for Pnut-mCherry.

494 **(I-J)** Schematic representing the polarized localization of proteins in XZ and XY planes.  
495 Asymmetric distribution of DE-cad, Baz and Pnut between edges and vertices in the XY  
496 plane **(I)**. Asymmetric distribution of DE-cad, Baz and Pnut across NC11-13 along the  
497 XZ plane **(J)**. While DE-cad spreads all across the length, Baz and Pnut are enriched in  
498 the basal part of the furrow region. The scatter plots contain a line connecting the  
499 means, \*p<0.05, \*\*p<0.01, and \*\*\*p<0.001, Two way ANOVA with Bonferroni post tests.  
500 The stars show significance between edge and vertex intensities at the indicated length  
501 based on the post test. Scale Bar=5  $\mu$ m. The zoomed in insets show a scale bar of 2  
502  $\mu$ m.

503

### 504 **Figure 3**

505 **Baz membrane binding domain is important for Pnut recruitment on the**  
506 **membrane.**

507 **(A-C, A'-C')** *mat-Gal4/+* **(A)** control (n=20), *baz<sup>j</sup>* **(B)** and *pnut<sup>XP</sup>* **(C)** embryos co-stained  
508 with Baz (green) and Pnut (red) **(A-C)**; DE-cad (red) and phalloidin (green) **(A'-C')**. *baz<sup>j</sup>*  
509 shows a decrease in Baz and Pnut (100%, n=20) **(B)**, DE-cad is unaffected (100%,  
510 n=10) **(B')**. *pnut<sup>XP</sup>* shows loss of Pnut (100%, n=17) **(C)**; Baz (100%, n=11) and DE-cad  
511 (100%, n=15) are unaffected **(C-C')**.

512 **(D-F)** Overexpression of Baz truncated for the PM binding domain decreases Pnut  
513 recruitment to the membrane. Control (n=10 embryos) **(D)**, *Baz $\Delta$ 969-1464-GFP* **(E)** and  
514 *Baz $\Delta$ 1-904-GFP* **(F)** expressing embryos co-stained with Baz (green), Pnut (red) and

515 GFP (cyan). Baz $\Delta$ 969-1464-GFP shows cytosolic distribution and Baz antibody shows  
516 membrane and cytosolic localization (**E**). These embryos also show loss of Pnut from  
517 the membrane (87%, n=24 embryos). Baz $\Delta$ 1-904-GFP and Baz antibody shows  
518 membrane localization (**F**). Pnut distribution is slightly reduced but vertex enrichment is  
519 present (64%, n=14 embryos). DNA (grey).

520 Scale Bar=5  $\mu$ m

521

## 522 **Figure 4**

523 **Baz and Pnut depletion show delay in hexagon dominance and decreased furrow**  
524 **length.**

525 (**A-D**) Wild-type, *baz*<sup>j</sup> and *pnut*<sup>XP</sup> embryos stained with phalloidin in NC12-13 (**A,C**)  
526 along with the respective colour-coded polygon renderings (**B,D**).

527 (**E**) Polygon distribution in the mutants and wild-type stained with phalloidin in NC12-13.  
528 Polygon distributions of wild-type and *baz*<sup>j</sup> and *pnut*<sup>XP</sup> embryos are significantly different  
529 from each other (\*p<0.05) at NC12 but not at NC13. Multinomial chi square test  
530 (n=approx. 60-80 syncytial cells, 20-30 cells/embryo; 4-5 embryos). Hexagon  
531 dominance in *baz*<sup>j</sup> and *pnut*<sup>XP</sup> recovers in NC13. Pentagons and hexagons are  
532 compared in each cycle using the two tailed, unpaired, Student's t test. Data is  
533 represented as mean  $\pm$  SD, \*p<0.05, \*\*p<0.01, and \*\*\*p<0.001.

534 (**F-H**) *baz* and *pnut* mutant embryos show decreased furrow length. tGPH grazing  
535 sections in control, *baz*<sup>j</sup>, *pnut*<sup>j</sup> and *baz*<sup>j</sup> *pnut*<sup>j</sup> at NC12 (**F**). Quantification of metaphase  
536 furrow lengths in tGPH/+, *baz*<sup>j</sup> and *pnut*<sup>j</sup> in NC11-13 (n=12, 4 furrows; 3 embryos) (**G**).  
537 Data is represented as mean  $\pm$  SD, \*p<0.05, \*\*p<0.01, and \*\*\*p<0.001, Two tailed,  
538 unpaired Student's t test. Scale bar: 5  $\mu$ m.

539

## 540 **Figure 5**

541 **DE-cad depletion results in mislocalization of Baz and Pnut, loss of hexagon**  
542 **dominance and decreased furrow length**

543 (**A-B, A'-B'**) DE-cad is lowered in *shg*<sup>j</sup> embryos. *nanos*-Gal4/+ (n=10) and *shg*<sup>j</sup> (**B**, 86%,  
544 n=21) embryos are stained with DE-cad (red) and phalloidin (green) (**A-B**); Baz (green)  
545 and Pnut (red) (**A'-B'**). Phalloidin, Baz and Pnut are more spread in *shg*<sup>j</sup> embryos (94%,

546 n=16) and the sharp distribution is lost.

547 **(C-G)** *shg<sup>j</sup>* embryos show loss of hexagon dominance. tGPH/+ and tGPH *shg<sup>j</sup>* embryos  
548 in NC12-13 **(C,E)** along with the respective colour-coded polygon renderings **(D,F)**.

549 Graph showing polygonal distribution in *shg<sup>j</sup>* in NC12-13 **(G)**. The polygon distributions  
550 of *shg<sup>j</sup>* are significantly different from control (\*p<0.05) using Chi square test (n=approx.  
551 120 syncytial cells, 20-30 cells/embryo; 4 embryos). Hexagon dominance is not seen in  
552 NC13. Pentagons and hexagons are compared in each cycle using the unpaired, two  
553 tailed, Student's t test. The NC13 polygon distribution for the control is repeated from  
554 Figure 1D.

555 **(H-I)** *shg<sup>j</sup>* embryos show decreased furrow length. tGPH grazing sections from control  
556 (n=4 embryos) and *shg<sup>j</sup>* with short furrow lengths at NC12 (61%, n=18 embryos) **(H)**.  
557 Graph showing quantification of metaphase furrow lengths in tGPH/+ and *shg<sup>j</sup>* embryos  
558 in NC11-13 (n=12, 4 furrows; 3 embryos) **(I)**. Data is represented as mean  $\pm$  SD,  
559 \*p<0.05, \*\*p<0.01, and \*\*\*p<0.001, Two tailed, unpaired Student's t test. Scale Bar = 5  
560  $\mu$ m.

561

562

## 563 **Figure 6**

564 **Appearance of hexagon dominance in Baz and Pnut knockdowns occurs at an**  
565 **increased furrow length in NC13.**

566 **(A-B)** *baz<sup>j</sup>* and *pnut<sup>f</sup>* embryos show loss of hexagon dominance at a shorter furrow  
567 length at NC13 when wildtype is already hexagon dominant. Grazing and sagittal  
568 sections of tGPH expressing control, *baz<sup>j</sup>* and *pnut<sup>f</sup>* embryos at NC13 at a short furrow  
569 length of 6.5  $\mu$ m **(A)** along with the respective colour-coded polygon renderings **(B)**.

570 **(C-D)** *baz<sup>j</sup>* and *pnut<sup>f</sup>* embryos show recovery of hexagon dominance at the maximum  
571 furrow length at metaphase NC13. Grazing and sagittal sections of tGPH expressing  
572 control, *baz<sup>j</sup>* and *pnut<sup>f</sup>* embryos at NC13 at the maximum furrow length at metaphase  
573 **(C)** along with the respective colour-coded polygon renderings **(D)**.

574 **(E-F)** Baz and Pnut knockdowns show a length dependent recovery of hexagon  
575 dominance at NC13. Graph showing the polygon distribution of control, *baz<sup>j</sup>* and *pnut<sup>f</sup>*  
576 embryos at NC13 at a short furrow length of 6.5 $\mu$ m and at metaphase **(E)**. Graph

577 showing the pentagon to hexagon ratio of control, *baz<sup>1</sup>* and *pnut<sup>1</sup>* embryos at NC13 at a  
578 short furrow length of 6.5  $\mu\text{m}$  and at metaphase (**F**). Data is represented as mean  $\pm$  SD,  
579 \* $p < 0.05$ , \*\* $p < 0.01$ , and \*\*\* $p < 0.001$ , Two tailed, unpaired Student's t test.

580 Scale Bar=5  $\mu\text{m}$

581

## 582 **Figure 7**

### 583 **Appearance of hexagon dominance in Baz and Pnut knockdowns correlates with** 584 **increased levels of DE-cad in NC13.**

585 **(A-C)** Myosin II and DE-cad distribution in NC13 in control embryos. Grazing sections of  
586 Sqh-mCherry **(A)** and DE-cad-GFP **(B)** expressing embryos at interphase and  
587 metaphase of NC12-13. Schematic representing the MyoII and DE-cad localization. DE-  
588 cad is on the membrane in interphase and metaphase while MyoII becomes cytosolic in  
589 metaphase **(C)**.

590 **(D-I)** MyoII levels remain unchanged and DE-cad levels increase in NC13 in Baz and  
591 Pnut knockdowns. Sqh-mCherry and DE-cad-GFP coexpressing control and Baz and  
592 Pnut depleted embryos were used for quantification of Sqh and DE-cad in NC12-13.  
593 Sqh-GFP was expressed in DE-cad depleted embryos for quantification of Sqh in  
594 NC12-13. Grazing section of Sqh-mCherry expressing control, *baz<sup>1</sup>* and *pnut<sup>1</sup>* embryos at  
595 interphase in NC12-13 **(D,D')**. Grazing sections of Sqh-GFP expressing control and *shg<sup>1</sup>*  
596 embryos at interphase in NC12-13 **(E,E')**. Note that Sqh-mCherry is generally more  
597 cytoplasmic as compared to Sqh-GFP. Hence the membrane to cytoplasm ratios for  
598 Sqh-mCherry were lower Sqh-GFP. Grazing sections of DE-cad-GFP expressing  
599 control, *baz<sup>1</sup>* and *pnut<sup>1</sup>* embryos at metaphase in NC12-13 **(F,F')**. Graph comparing  
600 MyoII membrane to cytosol ratio between control, *baz<sup>1</sup>* and *pnut<sup>1</sup>* in NC12-13 (n=12-15,  
601 5 cells per embryo, 3 embryos)**(G)**. Graph comparing MyoII membrane to cytosol ratio  
602 between control and *shg<sup>1</sup>* in NC12-13 (n=12-15, 5 cells per embryo, 3 embryos) **(H)**.  
603 Graph comparing DE-cad fold change with respect to NC12 between control, *baz<sup>1</sup>* and  
604 *pnut<sup>1</sup>* (n=12-15, 5 cells per embryo, 5 embryos) **(I)**. Data is represented as mean  $\pm$  SD,  
605 \* $p < 0.05$ , \*\* $p < 0.01$ , and \*\*\* $p < 0.001$ , Two tailed, unpaired Student's t test.

606 Scale Bar=5  $\mu\text{m}$ . The zoomed-in insets show scale bar of 3  $\mu\text{m}$ .

607

608

609 **Figure 8. Summary schematic showing the distribution of DE-cad, Baz and Pnut**  
610 **on the lateral furrow and polygon distribution in the *Drosophila* syncytial**  
611 **blastoderm embryo**

612 Control embryos show hexagon dominance in NC12-13 with significant amount of DE-  
613 cad, Baz and Pnut on the lateral furrow. Loss of Baz or Pnut results in a delay in the  
614 onset of hexagon dominance while loss of DE-cad results in loss of hexagon  
615 dominance. Note the difference in the protein complex composition of the various  
616 mutants. *baz<sup>1</sup>* shows loss of Pnut in addition to loss of Baz, while *pnut<sup>1</sup>* shows loss of  
617 Pnut only. DE-cad is unperturbed in both these cases. It instead shows an increase at  
618 NC13 which correlates with the recovery of hexagon dominance. *shg<sup>1</sup>*, on the other  
619 hand, shows lowering and mislocalization of Baz and Pnut.

620

621

622 **Materials and Methods**

623

624 **Fly stocks, crosses and lethality estimation**

625 *Drosophila melanogaster* stocks were raised in standard cornmeal agar at 25 °C  
626 and 29 °C for RNAi experiments. Embryos obtained from CantonS flies or CantonS flies  
627 crossed to *maternal*  $\square$ -*tubulin* Gal4-VP16 (*mat*-Gal4) or *nanos*-Gal4 (*nos*-Gal4) were  
628 used as control. Maternal driver line *mat67;mat15* carrying *maternal*  $\square$  4 *tubulin*-Gal4-  
629 VP16 (obtained from Girish Ratnaparkhi, IISER, Pune, India), homozygous for  
630 chromosome II and III was used for all RNAi and overexpression experiments except for  
631 *shg<sup>1</sup>*. Baz RNAi (Bloomington Stock number #35002), Pnut RNAi (#65157), DE-cad  
632 RNAi (#38207), tGPH (#8163), UASp-Baz-GFP (#65845) and endo-DE-cad-GFP  
633 (#60584) lines were obtained from the Bloomington Stock Center, Indiana, Bloomington,  
634 USA. *ubi*-cad-GFP was obtained from the Maithreyi Narasimha lab from TIFR, Mumbai,  
635 India. *pnut<sup>XP</sup>* FRTG13/CyO and UASp-Pnut-mCherry stocks were obtained from Manos  
636 Mavrakis, Fresnel University, Marseilles, France. Baz truncation domain constructs  
637 were obtained from Andreas Wodarz, Goettingen University, Germany. *Sqh*-*Sqh*  
638 Cherry, *mat67*-Gal4; *Ubi*-DE-cad-GFP, *mat15*-Gal4/TM3Sb was obtained from Adam

639 Martin's lab, MIT, Massachusetts, USA. *Sqh-Sqh* GFP, *mat67-Gal4* from Thomas  
640 Lecuit, IBDM, Marseilles, France.

641 F1 flies were put in a cage for egg collection to perform immunostaining or live  
642 imaging. Germline clones of *pnut*<sup>XP</sup> were made by crossing *ovo*<sup>D</sup> FRTG13 males to  
643 *hsflp; GlaB1c* females to obtain *hsflp; ovo*<sup>D</sup> FRTG13/*GlaB1c* males. These males were  
644 then crossed to *pnut*<sup>XP</sup> FRTG13/*Cyo* females. Larvae, pupae and adults emerging from  
645 this cross were heat shocked at 37.5 °C. *hsflp; ovo*<sup>D</sup> FRTG13/*pnut*<sup>XP</sup> FRTG13 adults  
646 were then put in a cage to collect embryos depleted of *pnut*. *shg*<sup>j</sup> was crossed to a  
647 single chromosomal copy of *nos-Gal4* and maintained at 18 °C to lower the severity of  
648 phenotype and obtain fertilized eggs to perform experiments. F1 flies expressing *shg*<sup>j</sup>  
649 with *nos-Gal4* when grown at 25 or 29 °C, laid embryos that were arrested early in the  
650 pre-blastoderm stage of development and, hence, the experiments were performed at  
651 18 °C to allow for Gal4 dilution. This cross at 18 °C gave enough embryos that entered  
652 the syncytial cycles. The lethality of *shg*<sup>j</sup> embryos was 100% (n=150) at 25 °C and 29  
653 °C and 70% (n=200) at 18 °C after 24 hours. The lethality of *pnut*<sup>i</sup> and *baz*<sup>j</sup> expressing  
654 embryos and *pnut*<sup>XP</sup> germline clones was 100% (n=300 embryos each).

655

## 656 Immunostaining

657 0-2.5 hr old embryos were collected on sucrose agar plates, washed and  
658 dechorionated with 100% bleach for 1 min. Embryos were then fixed using 1:1 mixture  
659 of 4% Paraformaldehyde in PBS and Heptane for 20 min. Fixed embryos were then  
660 either hand-de-vitellinized for phalloidin staining or MeOH de-vitellinized, washed thrice  
661 in 1X PBST (1X PBS with 0.3% Triton X100) and blocked in 2% BSA (Sigma-Aldrich,  
662 India) in 1X PBST for 1 hr. Primary antibody was then added at an appropriate dilution  
663 and incubated overnight, followed by three 1X PBST washes, and 1hr incubation in  
664 appropriate fluorescently coupled secondary antibodies at 1:1000 (Molecular probes,  
665 Bangalore, India). Hoechst 33258 was added for 10 min in 1X PBST. Finally, the  
666 embryos were washed three times in 1X PBST and mounted in Slow fade Gold antifade  
667 reagent (Molecular Probes). The primary antibodies used were: rabbit anti-Baz (1:1000  
668 from Andreas Wodarz, Germany), mouse anti-Pnut (1:5, DSHB), mouse anti-Dlg (1:100  
669 DSHB), rabbit anti-Patj (1:1000 from Hugo Bellen, USA), rat Sep1 (1:250 from Manos

670 Mavrakis, France), guinea pig Sep2 (1:250 from Manos Mavrakis, France), rat anti-DE-  
671 cad (1:5, DSHB), DNA was stained with Hoechst 33258 (1:1000, Molecular Probes,  
672 Bangalore, India).

673

#### 674 **Live Imaging of *Drosophila* embryos**

675 1-1.5 hr old embryos expressing the membrane marker tGPH or Sqh-GFP or Sqh-  
676 mCherry; DE-cad-GFP were collected and dechorionated with 100% bleach for 1 min  
677 and mounted on coverslip-bottomed LabTek chambers (Mavrakis *et al.*, 2008). The  
678 chambers were then filled with 1X PBS and imaged on Zeiss Plan APOCHROMAT 40X/ 1.4  
679 NA oil objective.

680

#### 681 **Microscopy**

682 Live or fixed embryos were imaged on any of the following laser scanning confocal  
683 microscopes: Zeiss LSM710, LSM780 and Leica SP8. The 40X objective with NA 1.4  
684 was used to image living and fixed embryos. The Argon laser was used to image GFP  
685 in tGPH, DE-cad, Baz-GFP and Sqh-GFP. The Diode 561 laser was used to image the  
686 Sqh-mCherry and Pnut-mCherry. Care was taken to maintain the laser power and gain  
687 with the range indicator mode such that the 8-bit image acquired did not show any  
688 saturation and was within the 0-255 range. Averaging of 2 was used for both fixed and  
689 live imaging. Images were acquired with an optical section of 1.08 microns in all except  
690 actin stainings where an optical section of 0.34 microns was used.

691

#### 692 **Embryo Lethality**

693 3-4hr old embryos were collected, washed and arranged into a 10 x 10 matrix on a  
694 sugar-agar plate using a brush. The number of unhatched embryos were counted after  
695 24 hrs. This procedure was repeated 3 times for each genotype tested.

696

#### 697 **Quantification and statistical analysis**

698

#### 699 **Image quantification:**

700

## 701 **Polygon analysis**

702 The most taut and bright grazing section from metaphase (usually at the base of the  
703 furrow) of each NC per embryo was used to quantify polygons using the Packing  
704 analyzer software (Benoit Aigouy, Classen et al., 2005, [https://idisk-srv1.mpi-  
705 cbg.de/~eaton/](https://idisk-srv1.mpi-cbg.de/~eaton/)). The software allows to outline each cell and colour code it according to  
706 polygon type. It also provides an excel sheet with the area, perimeter and polygon type  
707 of each cell in the field. 3 or more embryos were used per NC and all the cells in the  
708 field were analysed this way to obtain the polygon distribution per cycle.

709

## 710 **Quantification of relative fluorescent signal across depth and in planar sections 711 of the plasma membrane**

712 The grazing sections at metaphase across depth expressing various polarity proteins  
713 were used for this analysis. ROIs were drawn at 5 edges and 5 vertices for NC11, and  
714 10 edges and 10 vertices for NC12-13, in each optical section from apical to basal  
715 sections. Optical sections were taken at approximately 1  $\mu\text{m}$  depth across the entire  
716 furrow. The mean intensities from these ROIs were measured using ImageJ. The  
717 intensities from each stack were background subtracted. The graphs shown in Figure 2  
718 represent mean intensities obtained across the depth of the furrow normalized to the  
719 mean intensity of the apical-most optical section in NC11.

720 For calculating relative fold change of fluorescence for DE-cad-GFP, Baz-GFP  
721 and Pnut-mCherry in the furrow in NC11 to NC13, total intensities across the furrow  
722 length were computed by summation of the mean intensity across the number of optical  
723 stacks in NC11, 12 and 13. The total intensities obtained for the entire furrow in NC12  
724 and 13 were divided by the total intensity obtained in NC11 to obtain fold change.

725 Quantification for Dlg, Sep1 and Sep2 was done by creating 5 ROIs on the edge  
726 and the vertex as mentioned above. The mean intensities were normalized by dividing  
727 by the mean intensity of the entire field.

728 Enrichment in the basal furrow region and edge/vertex were computed by  
729 performing statistical analysis for the fluorescence values on the length of the furrow  
730 using two way ANOVA to test how the intensity of signals varied with either edge/vertex  
731 or apical/basal regions of the furrow.



732

733

### 734 **Quantification of the metaphase furrow length**

735 Metaphase furrow lengths were quantified from the orthogonal sections for different time  
736 points and NCs using the Zen blue software. Approximately 5-8 furrows were measured  
737 per time point per embryo. These lengths were further confirmed with the number of z  
738 stacks taken to cover the entire furrow length of syncytial cells in the field of view.

739

### 740 **Statistical analysis**

741 All data are represented as mean  $\pm$  SD. Statistical significance was determined using  
742 the Two-tailed, unpaired, Student's t-test in most cases, to compare between two  
743 means. One way ANOVA was used when comparing three or more means together,  
744 with Dunnett's Multiple Comparison Test as post test to compare all means to a control.  
745 Multinomial Chi square test was used to compare the polygon distributions between  
746 control and mutants in addition to the Student's t test to compare hexagons versus  
747 pentagons for checking hexagon dominance.

748

### 749 **Data and software availability**

750 All raw data in the form of movies and images is available on request from the  
751 corresponding author.

752

### 753 **References**

754 Benton, R, and St Johnston, D (2003). Drosophila PAR-1 and 14-3-3 inhibit  
755 Bazooka/PAR-3 to establish complementary cortical domains in polarized cells. *Cell*  
756 115, 691–704.

757 Britton, JS, Lockwood, WK, Li, L, Cohen, SM, and Edgar, BA (2002). Drosophila's  
758 insulin/PI3-kinase pathway coordinates cellular metabolism with nutritional conditions.  
759 *Dev Cell* 2, 239–249.

760 Classen, A-K, Anderson, KI, Marois, E, and Eaton, S (2005). Hexagonal Packing of

- 761 *Drosophila* Wing Epithelial Cells by the Planar Cell Polarity Pathway. *Developmental*  
762 *Cell* 9, 805–817.
- 763 Foe, VE, and Alberts, BM (1983). Studies of nuclear and cytoplasmic behaviour during  
764 the five mitotic cycles that precede gastrulation in *Drosophila* embryogenesis. *J Cell Sci*  
765 61, 31–70.
- 766 Foe, VE, Field, CM, and Odell, GM (2000). Microtubules and mitotic cycle phase  
767 modulate spatiotemporal distributions of F-actin and myosin II in *Drosophila* syncytial  
768 blastoderm embryos. *Development* 127, 1767–1787.
- 769 Frescas, D, Mavrakakis, M, Lorenz, H, Delotto, R, and Lippincott-Schwartz, J (2006). The  
770 secretory membrane system in the *Drosophila* syncytial blastoderm embryo exists as  
771 functionally compartmentalized units around individual nuclei. *J Cell Biol* 173, 219–230.
- 772 Gibson, MC, Patel, AB, Nagpal, R, and Perrimon, N (2006). The emergence of  
773 geometric order in proliferating metazoan epithelia. *Nature* 442, 1038–1041.
- 774 Harris, TJC, and Peifer, M (2004). Adherens junction-dependent and -independent  
775 steps in the establishment of epithelial cell polarity in *Drosophila*. *J Cell Biol* 167, 135–  
776 147.
- 777 Holly, RM, Mavor, LM, Zuo, Z, and Blankenship, JT (2015). A rapid, membrane-  
778 dependent pathway directs furrow formation through RalA in the early *Drosophila*  
779 embryo. *Development* 142, 2316–2328.
- 780 Iyer, KV, Piscitello-Gómez, R, Paijmans, J, Jülicher, F, and Eaton, S (2019). Epithelial  
781 Viscoelasticity Is Regulated by Mechanosensitive E-cadherin Turnover. *Curr Biol* 29,  
782 578–591.e5.
- 783 Izquierdo, E, Quinkler, T, and De Renzis, S (2018). Guided morphogenesis through  
784 optogenetic activation of Rho signalling during early *Drosophila* embryogenesis. *Nat*  
785 *Commun* 9, 2366.
- 786 Kalaji, R, Wheeler, AP, Erasmus, JC, Lee, SY, Endres, RG, Cramer, LP, and Braga,

- 787 VMM (2012). ROCK1 and ROCK2 regulate epithelial polarisation and geometric cell  
788 shape. *Biol Cell* 104, 435–451.
- 789 Karr, TL, and Alberts, BM (1986). Organization of the cytoskeleton in early *Drosophila*  
790 embryos. *J Cell Biol* 102, 1494–1509.
- 791 Laprise, P, Lau, KM, Harris, KP, Silva-Gagliardi, NF, Paul, SM, Beronja, S, Beitel, GJ,  
792 McGlade, CJ, and Tepass, U (2009). Yurt, Coracle, Neurexin IV and the Na<sup>+</sup>,K<sup>+</sup>-  
793 ATPase form a novel group of epithelial polarity proteins. *Nature* 459, 1141–1145.
- 794 Lecuit, T (2004). Junctions and vesicular trafficking during *Drosophila* cellularization. *J*  
795 *Cell Sci* 117, 3427–3433.
- 796 Lecuit, T, and Lenne, P-F (2007). Cell surface mechanics and the control of cell shape,  
797 tissue patterns and morphogenesis. *Nat Rev Mol Cell Biol* 8, 633–644.
- 798 Martin, AC, Kaschube, M, and Wieschaus, EF (2009). Pulsed contractions of an actin–  
799 myosin network drive apical constriction. *Nature* 457, 495–499.
- 800 Mavrakis, M, Azou-Gros, Y, Tsai, F-C, Alvarado, J, Bertin, A, Iv, F, Kress, A, Brasselet,  
801 S, Koenderink, GH, and Lecuit, T (2014). Septins promote F-actin ring formation by  
802 crosslinking actin filaments into curved bundles. *Nat Cell Biol* 16, 322–334.
- 803 Mavrakis, M, Rikhy, R, Lilly, M, and Lippincott-Schwartz, J (2008). Fluorescence  
804 imaging techniques for studying *Drosophila* embryo development. *Curr Protoc Cell Biol*  
805 Chapter 4, Unit 4.18.
- 806 Mavrakis, M, Rikhy, R, and Lippincott-Schwartz, J (2009). Plasma Membrane Polarity  
807 and Compartmentalization Are Established before Cellularization in the Fly Embryo.  
808 *Dev Cell* 16, 93–104.
- 809 Miller, KG, Karr, TL, Kellogg, DR, Mohr, IJ, Walter, M, and Alberts, BM (1985). Studies  
810 on the cytoplasmic organization of early *Drosophila* embryos. *Cold Spring Harb Symp*  
811 *Quant Biol* 50, 79–90.

- 812 Nance, J (2014). Getting to know your neighbor: cell polarization in early embryos. *J*  
813 *Cell Biol* 206, 823–832.
- 814 Pesacreta, TC, Byers, TJ, Dubreuil, R, Kiehart, DP, and Branton, D (1989). *Drosophila*  
815 spectrin: the membrane skeleton during embryogenesis. *J Cell Biol* 108, 1697–1709.
- 816 Pilot, F, Philippe, J-M, Lemmers, C, and Lecuit, T (2006). Spatial control of actin  
817 organization at adherens junctions by a synaptotagmin-like protein Btsz. *Nature* 442,  
818 580–584.
- 819 Rikhy, R, Mavrakis, M, and Lippincott-Schwartz, J (2015). Dynamin regulates  
820 metaphase furrow formation and plasma membrane compartmentalization in the  
821 syncytial *Drosophila* embryo. *Biol Open* 4, 301–311.
- 822 Royou, A, Field, C, Sisson, JC, Sullivan, W, and Karess, R (2004). Reassessing the role  
823 and dynamics of nonmuscle myosin II during furrow formation in early *Drosophila*  
824 embryos. *Mol Biol Cell* 15, 838–850.
- 825 Sánchez-Gutiérrez, D, Sáez, A, Pascual, A, and Escudero, LM (2013). Topological  
826 progression in proliferating epithelia is driven by a unique variation in polygon  
827 distribution. *PLoS One* 8, e79227.
- 828 Schmidt, A, and Grosshans, J (2018). Dynamics of cortical domains in early  
829 development. *J Cell Sci* 131.
- 830 Schmidt, A, Lv, Z, and Großhans, J (2018). ELMO and Sponge specify subapical  
831 restriction of Canoe and formation of the subapical domain in early *Drosophila* embryos.  
832 *Development* 145, dev157909.
- 833 Sherlekar, A, and Rikhy, R (2016). Syndapin promotes pseudocleavage furrow  
834 formation by actin organization in the syncytial *Drosophila* embryo. *Mol Biol Cell* 27,  
835 2064–2079.
- 836 Stevenson, V, Hudson, A, Cooley, L, and Theurkauf, WE (2002). Arp2/3-dependent  
837 pseudocleavage [correction of psuedocleavage] furrow assembly in syncytial *Drosophila*

- 838 embryos. *Curr Biol* 12, 705–711.
- 839 Thomas, GH, and Williams, JA (1999). Dynamic rearrangement of the spectrin  
840 membrane skeleton during the generation of epithelial polarity in *Drosophila*. *J Cell Sci*  
841 112 ( Pt 17), 2843–2852.
- 842 Turner, FR, and Mahowald, AP (1976). Scanning electron microscopy of *Drosophila*  
843 embryogenesis. 1. The structure of the egg envelopes and the formation of the cellular  
844 blastoderm. *Dev Biol* 50, 95–108.
- 845 Wei, S-Y et al. (2005). Echinoid is a component of adherens junctions that cooperates  
846 with DE-Cadherin to mediate cell adhesion. *Dev Cell* 8, 493–504.
- 847 Wodarz, A, Ramrath, A, Kuchinke, U, and Knust, E (1999). Bazooka provides an apical  
848 cue for Inscuteable localization in *Drosophila* neuroblasts. *Nature* 402, 544–547.
- 849 Xie, Y, and Todd Blankenship, J (2018). Differentially-dimensioned furrow formation by  
850 zygotic gene expression and the MBT. *PLOS Genetics* 14, e1007174.
- 851 Zallen, JA, Cohen, Y, Hudson, AM, Cooley, L, Wieschaus, E, and Schejter, ED (2002).  
852 SCAR is a primary regulator of Arp2/3-dependent morphological events in *Drosophila*. *J*  
853 *Cell Biol* 156, 689–701.
- 854 Zhang, Y, Yu, JC, Jiang, T, Fernandez-Gonzalez, R, and Harris, TJC (2018). Collision  
855 of Expanding Actin Caps with Actomyosin Borders for Cortical Bending and Mitotic  
856 Rounding in a Syncytium. *Dev Cell* 45, 551–564.e4.
- 857

**A**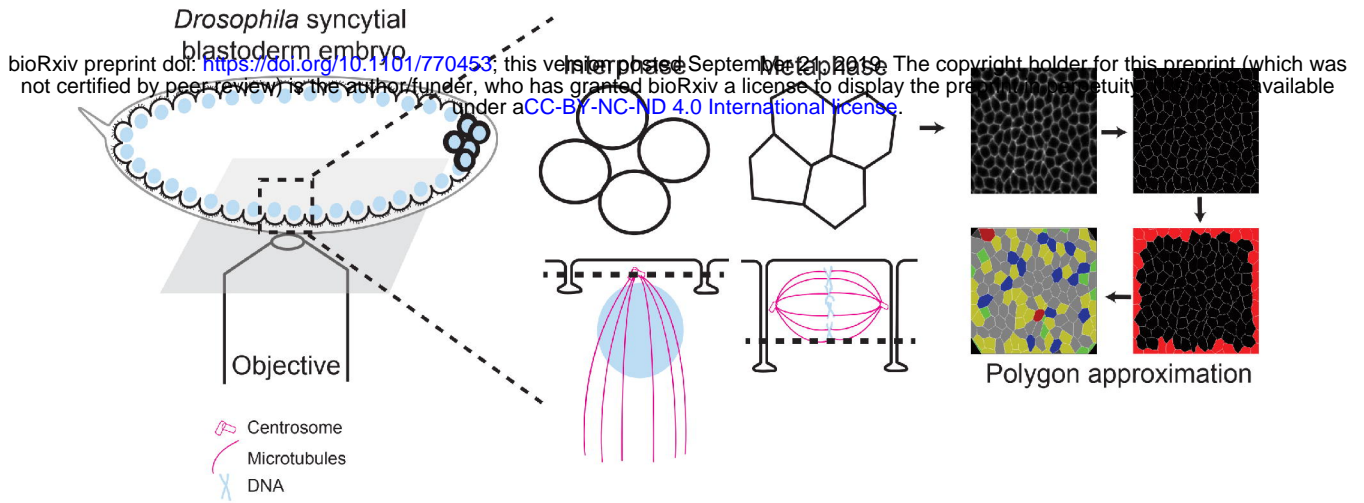**B** tGPH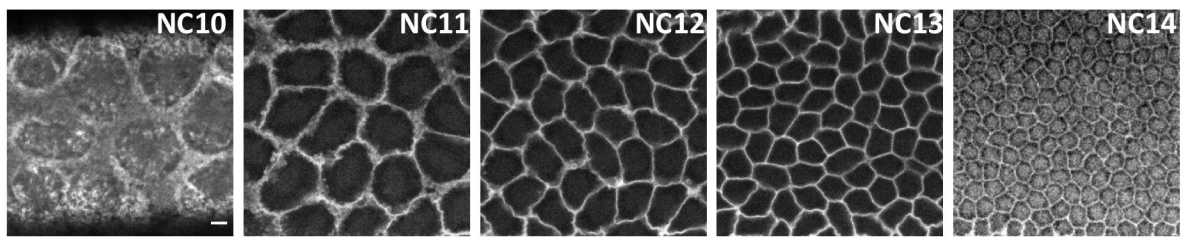**C**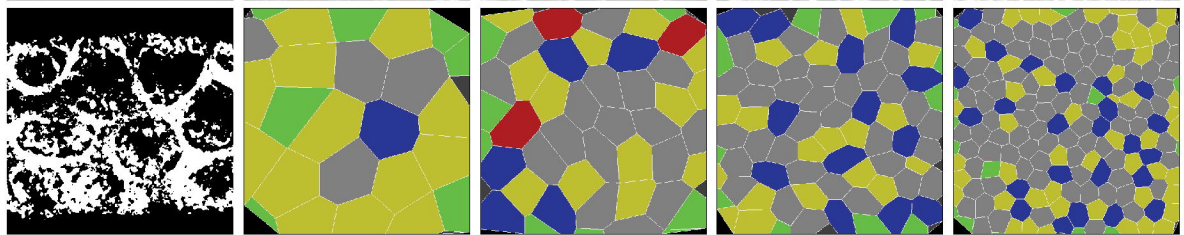**D**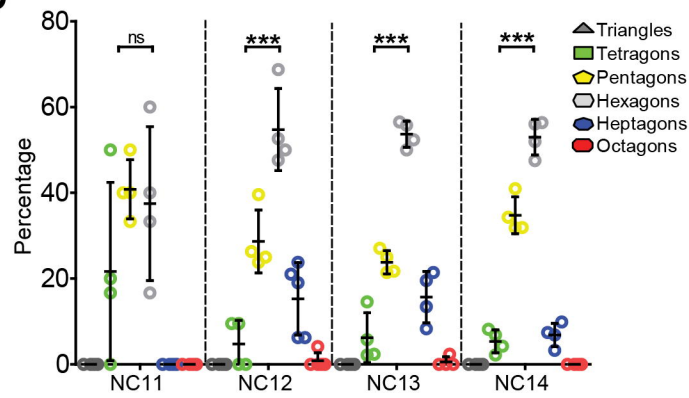**E** tGPH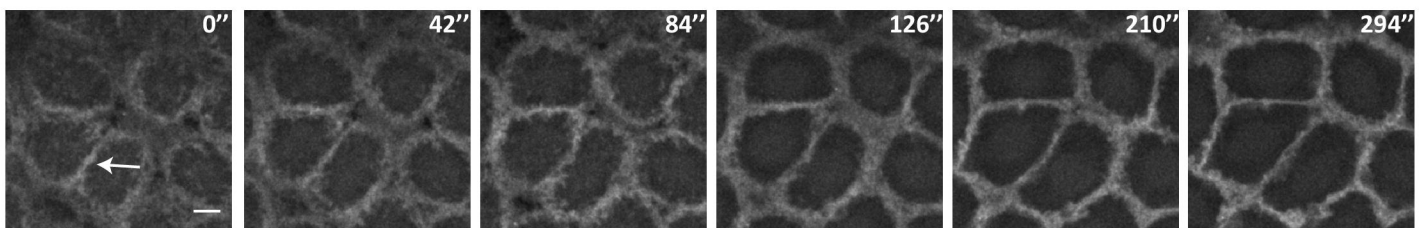

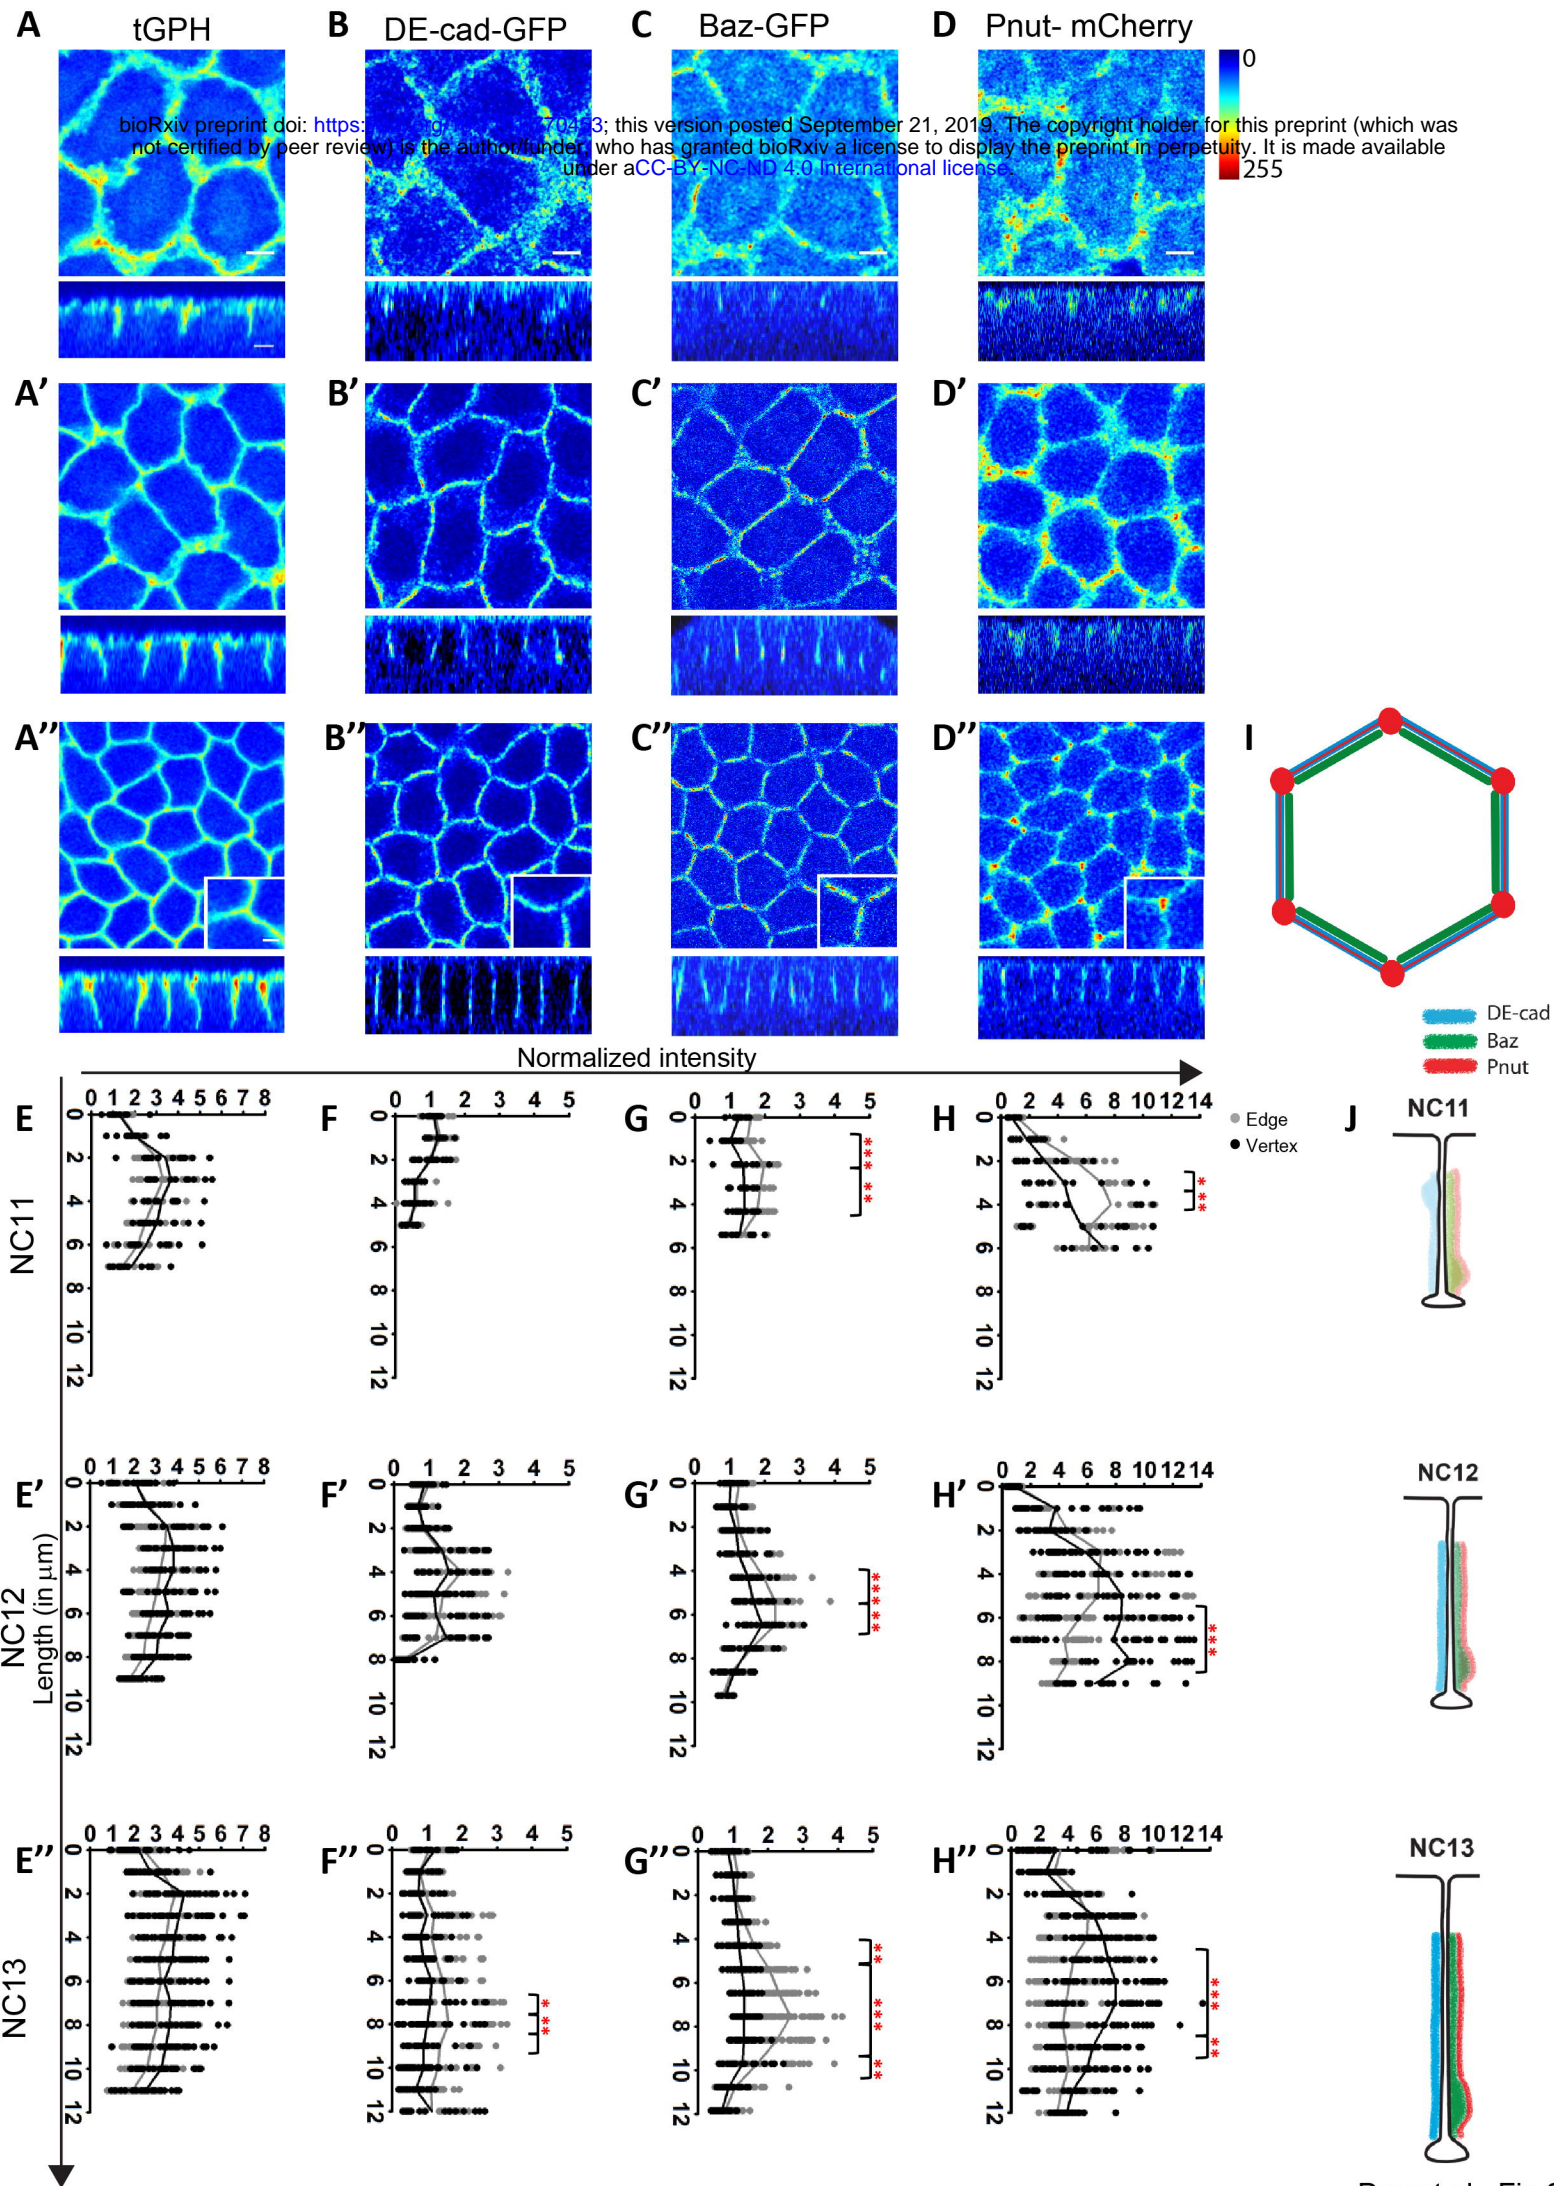

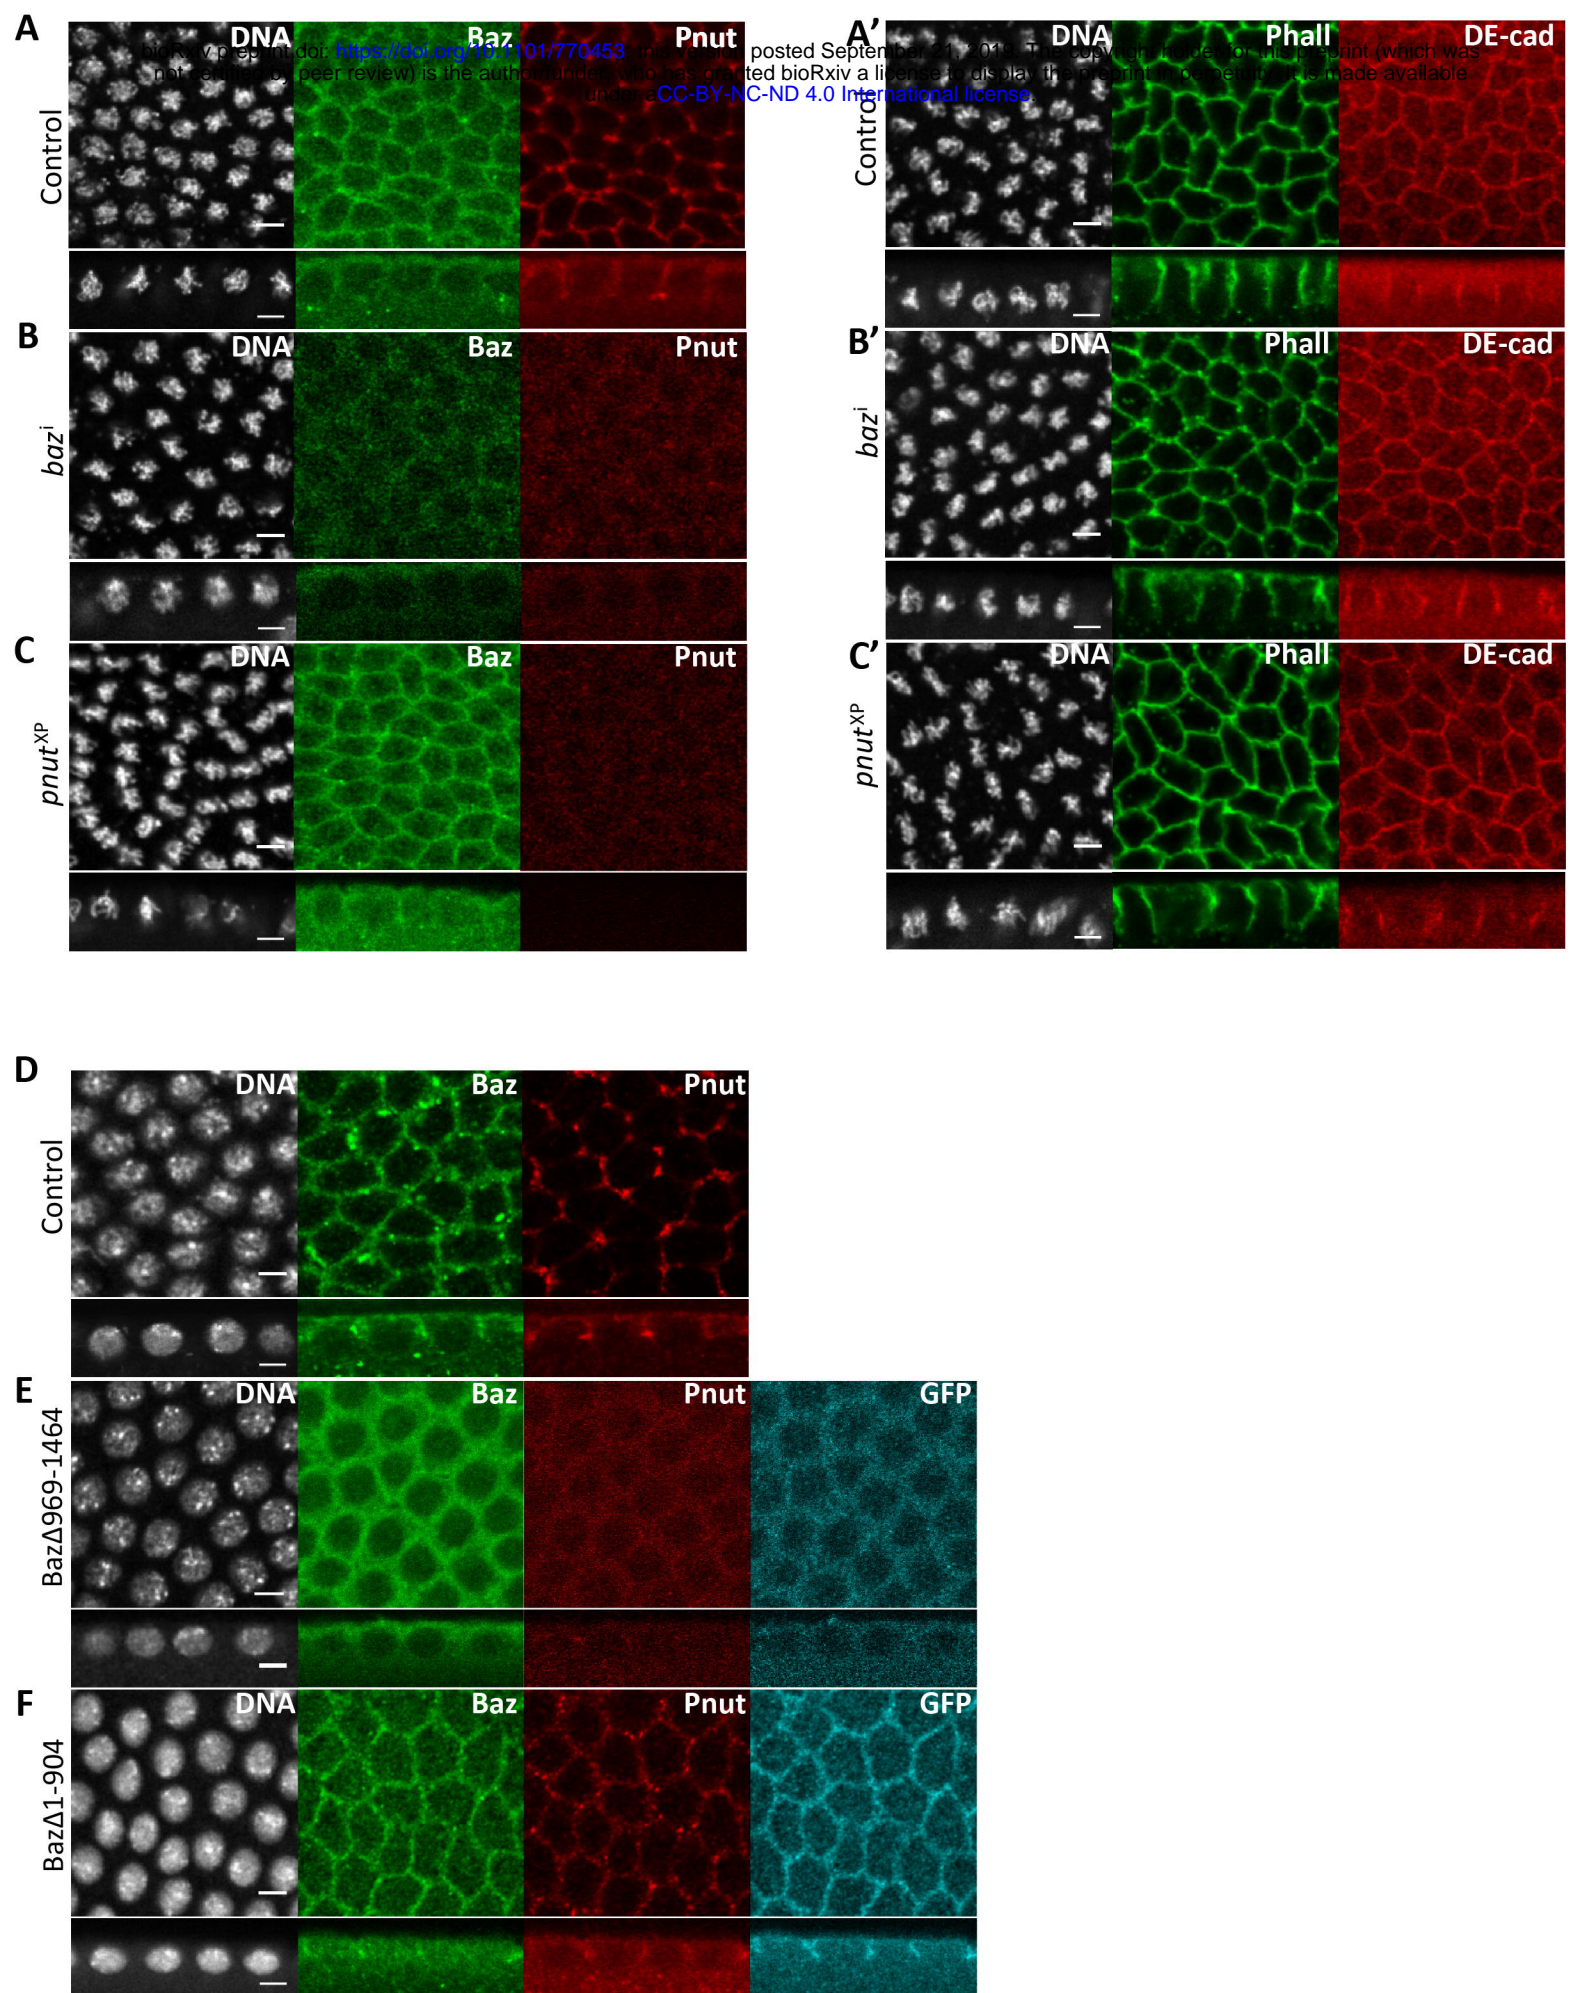



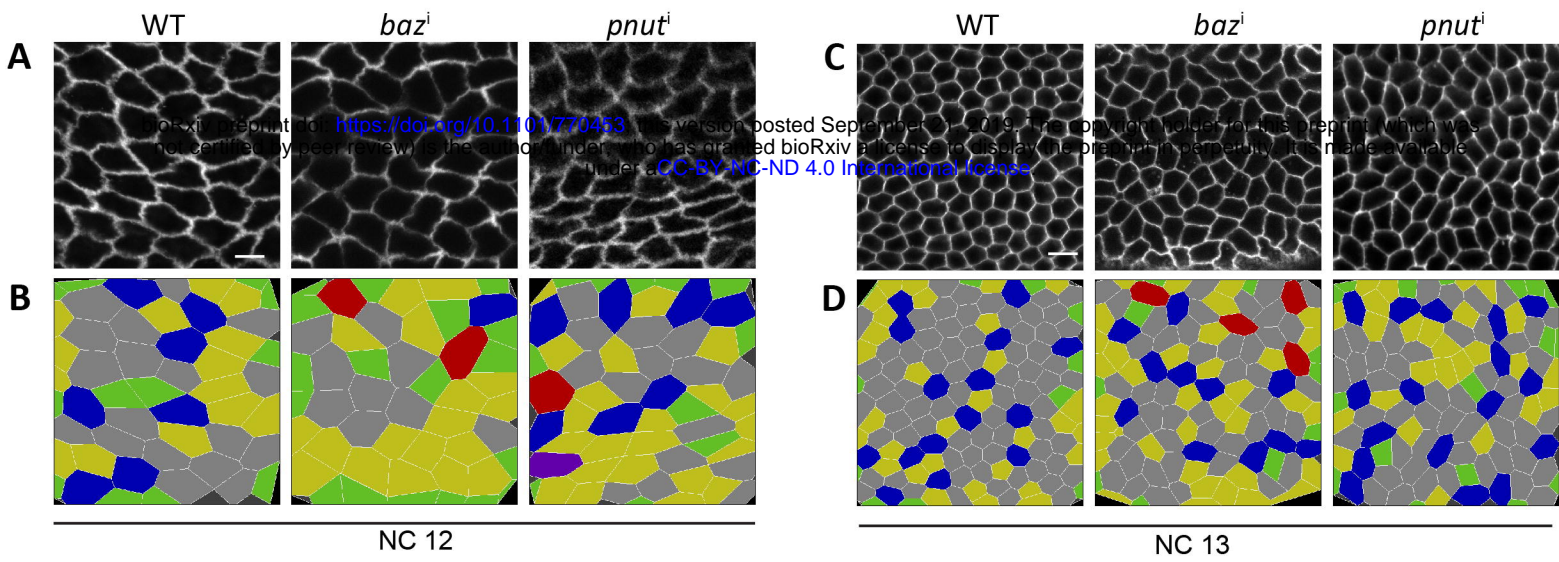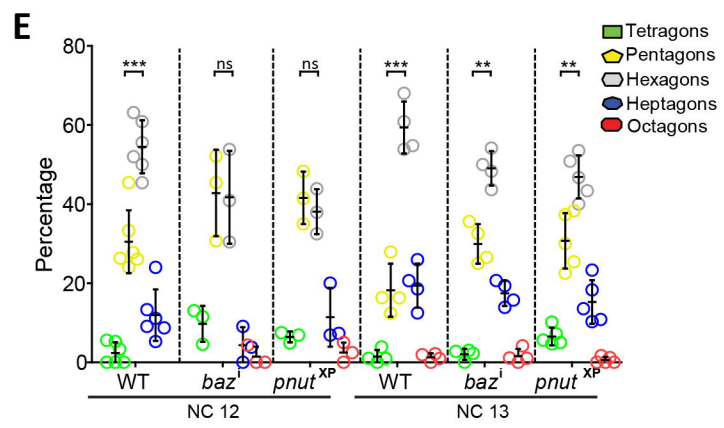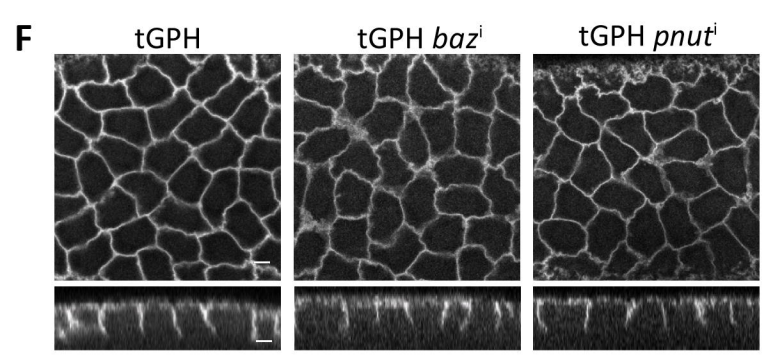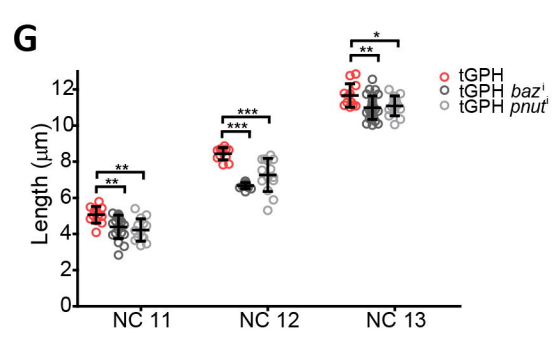

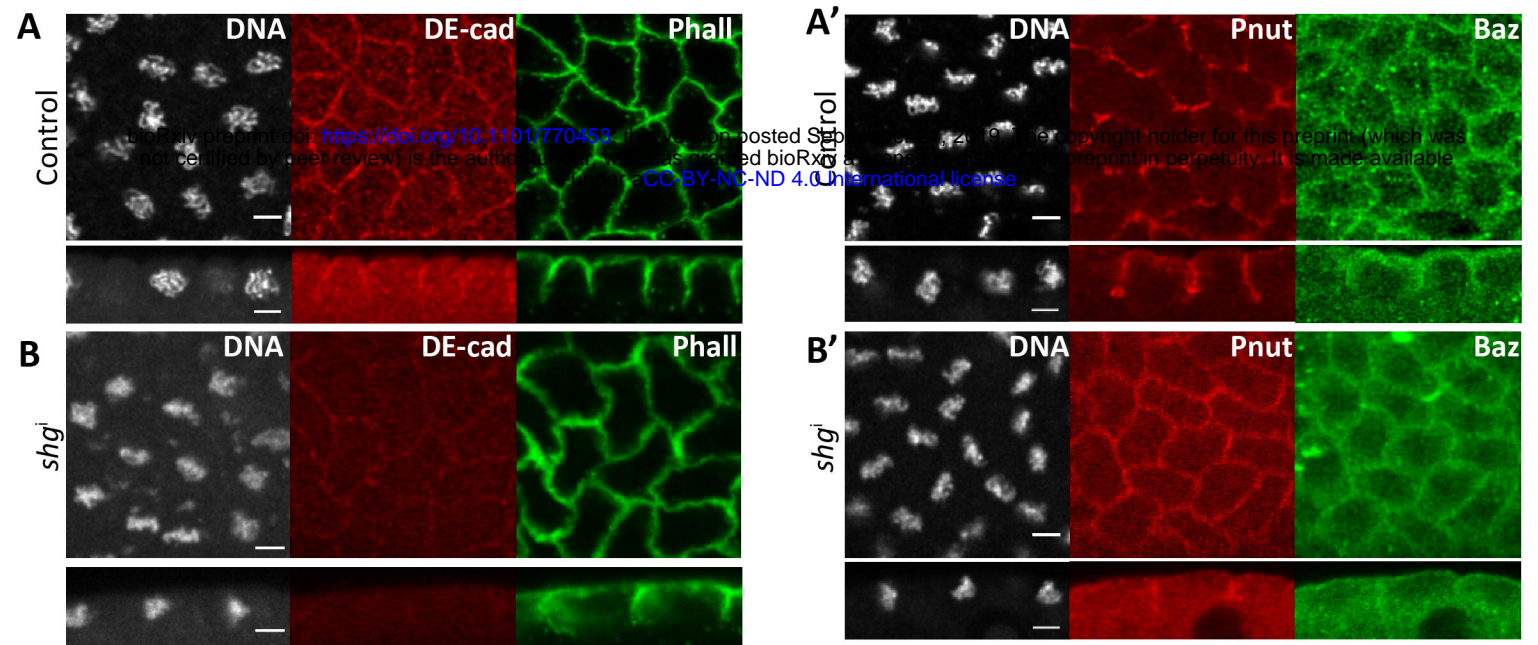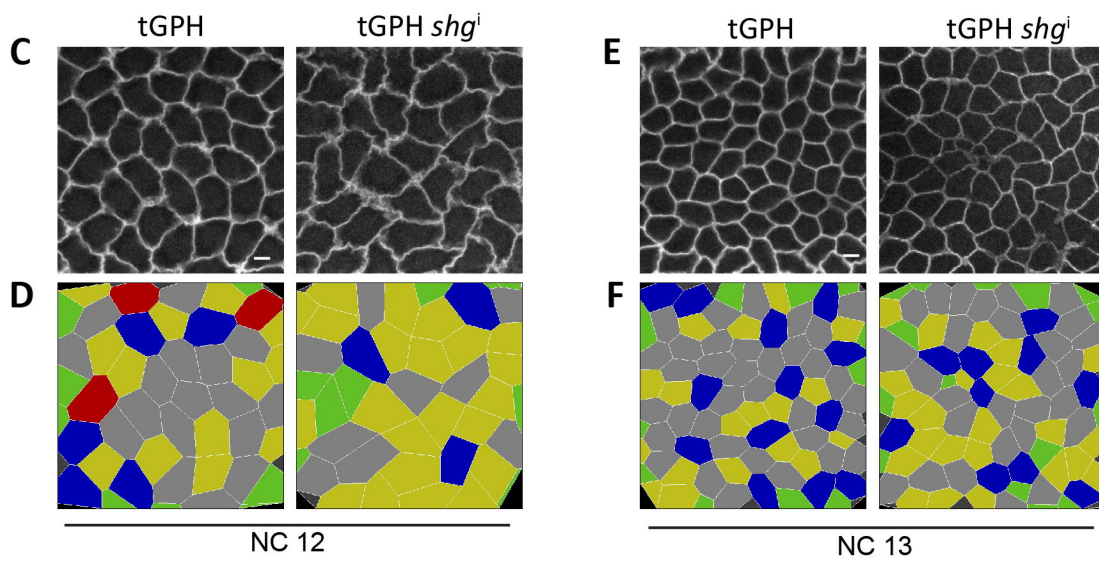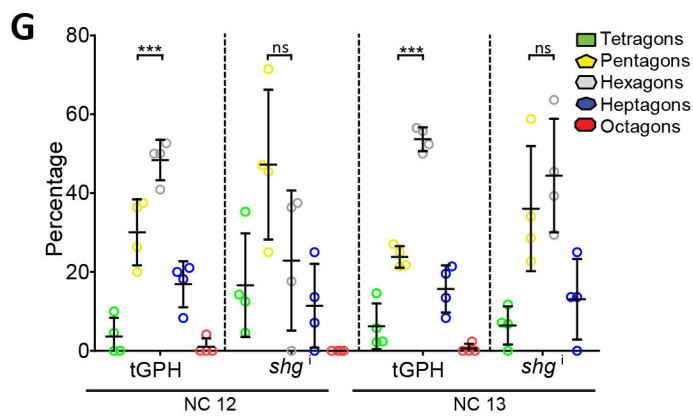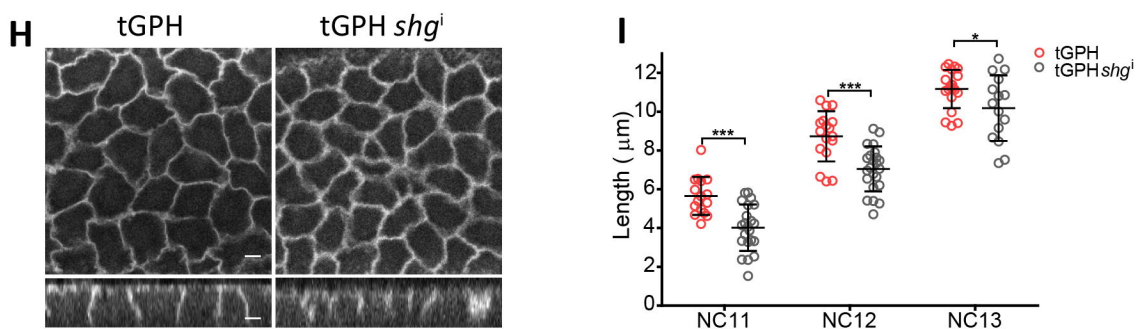

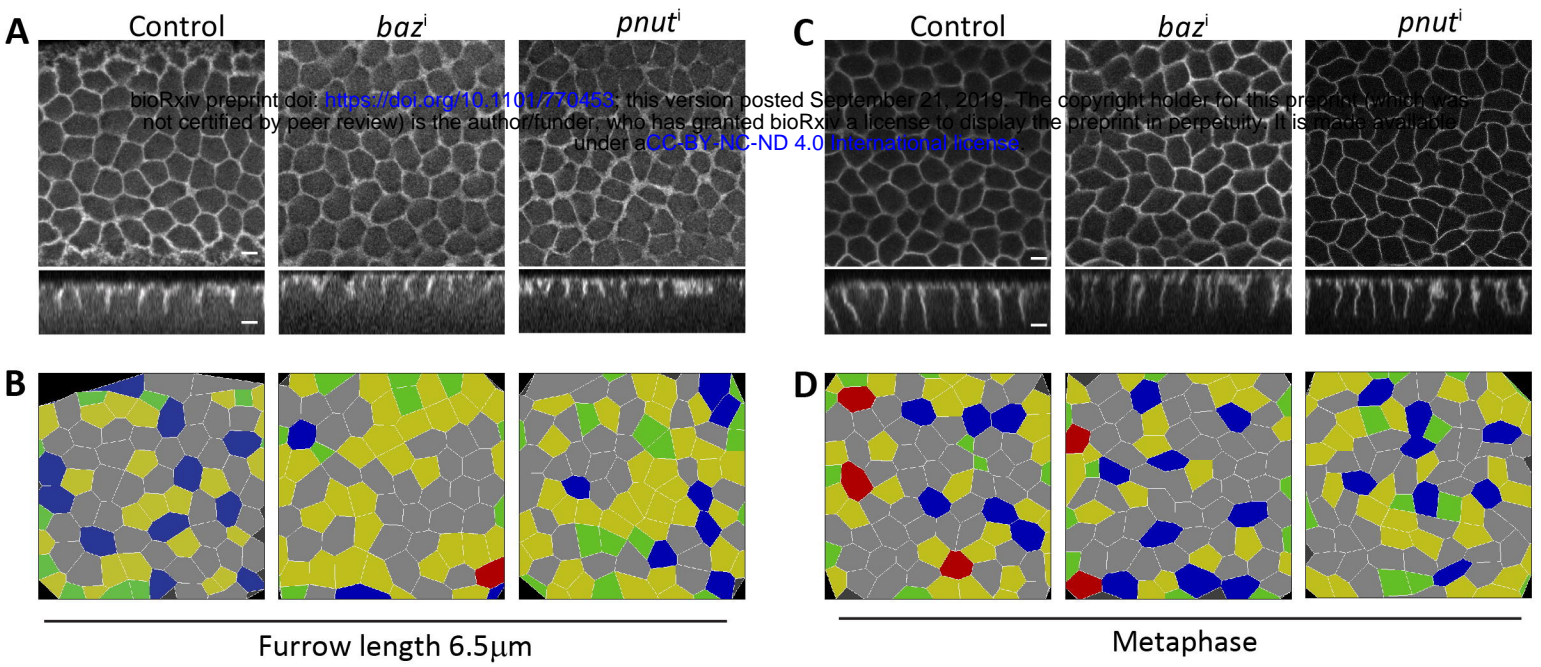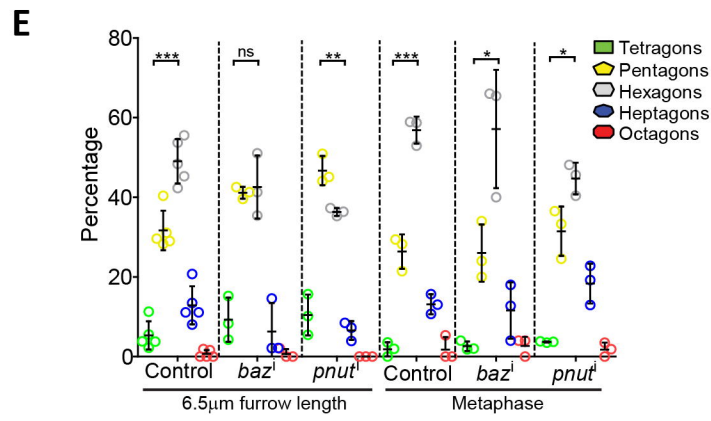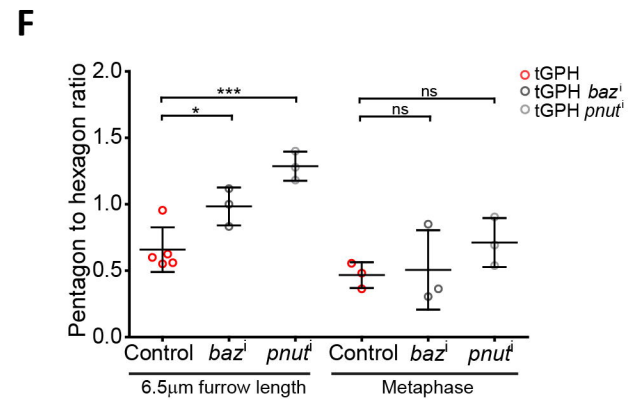

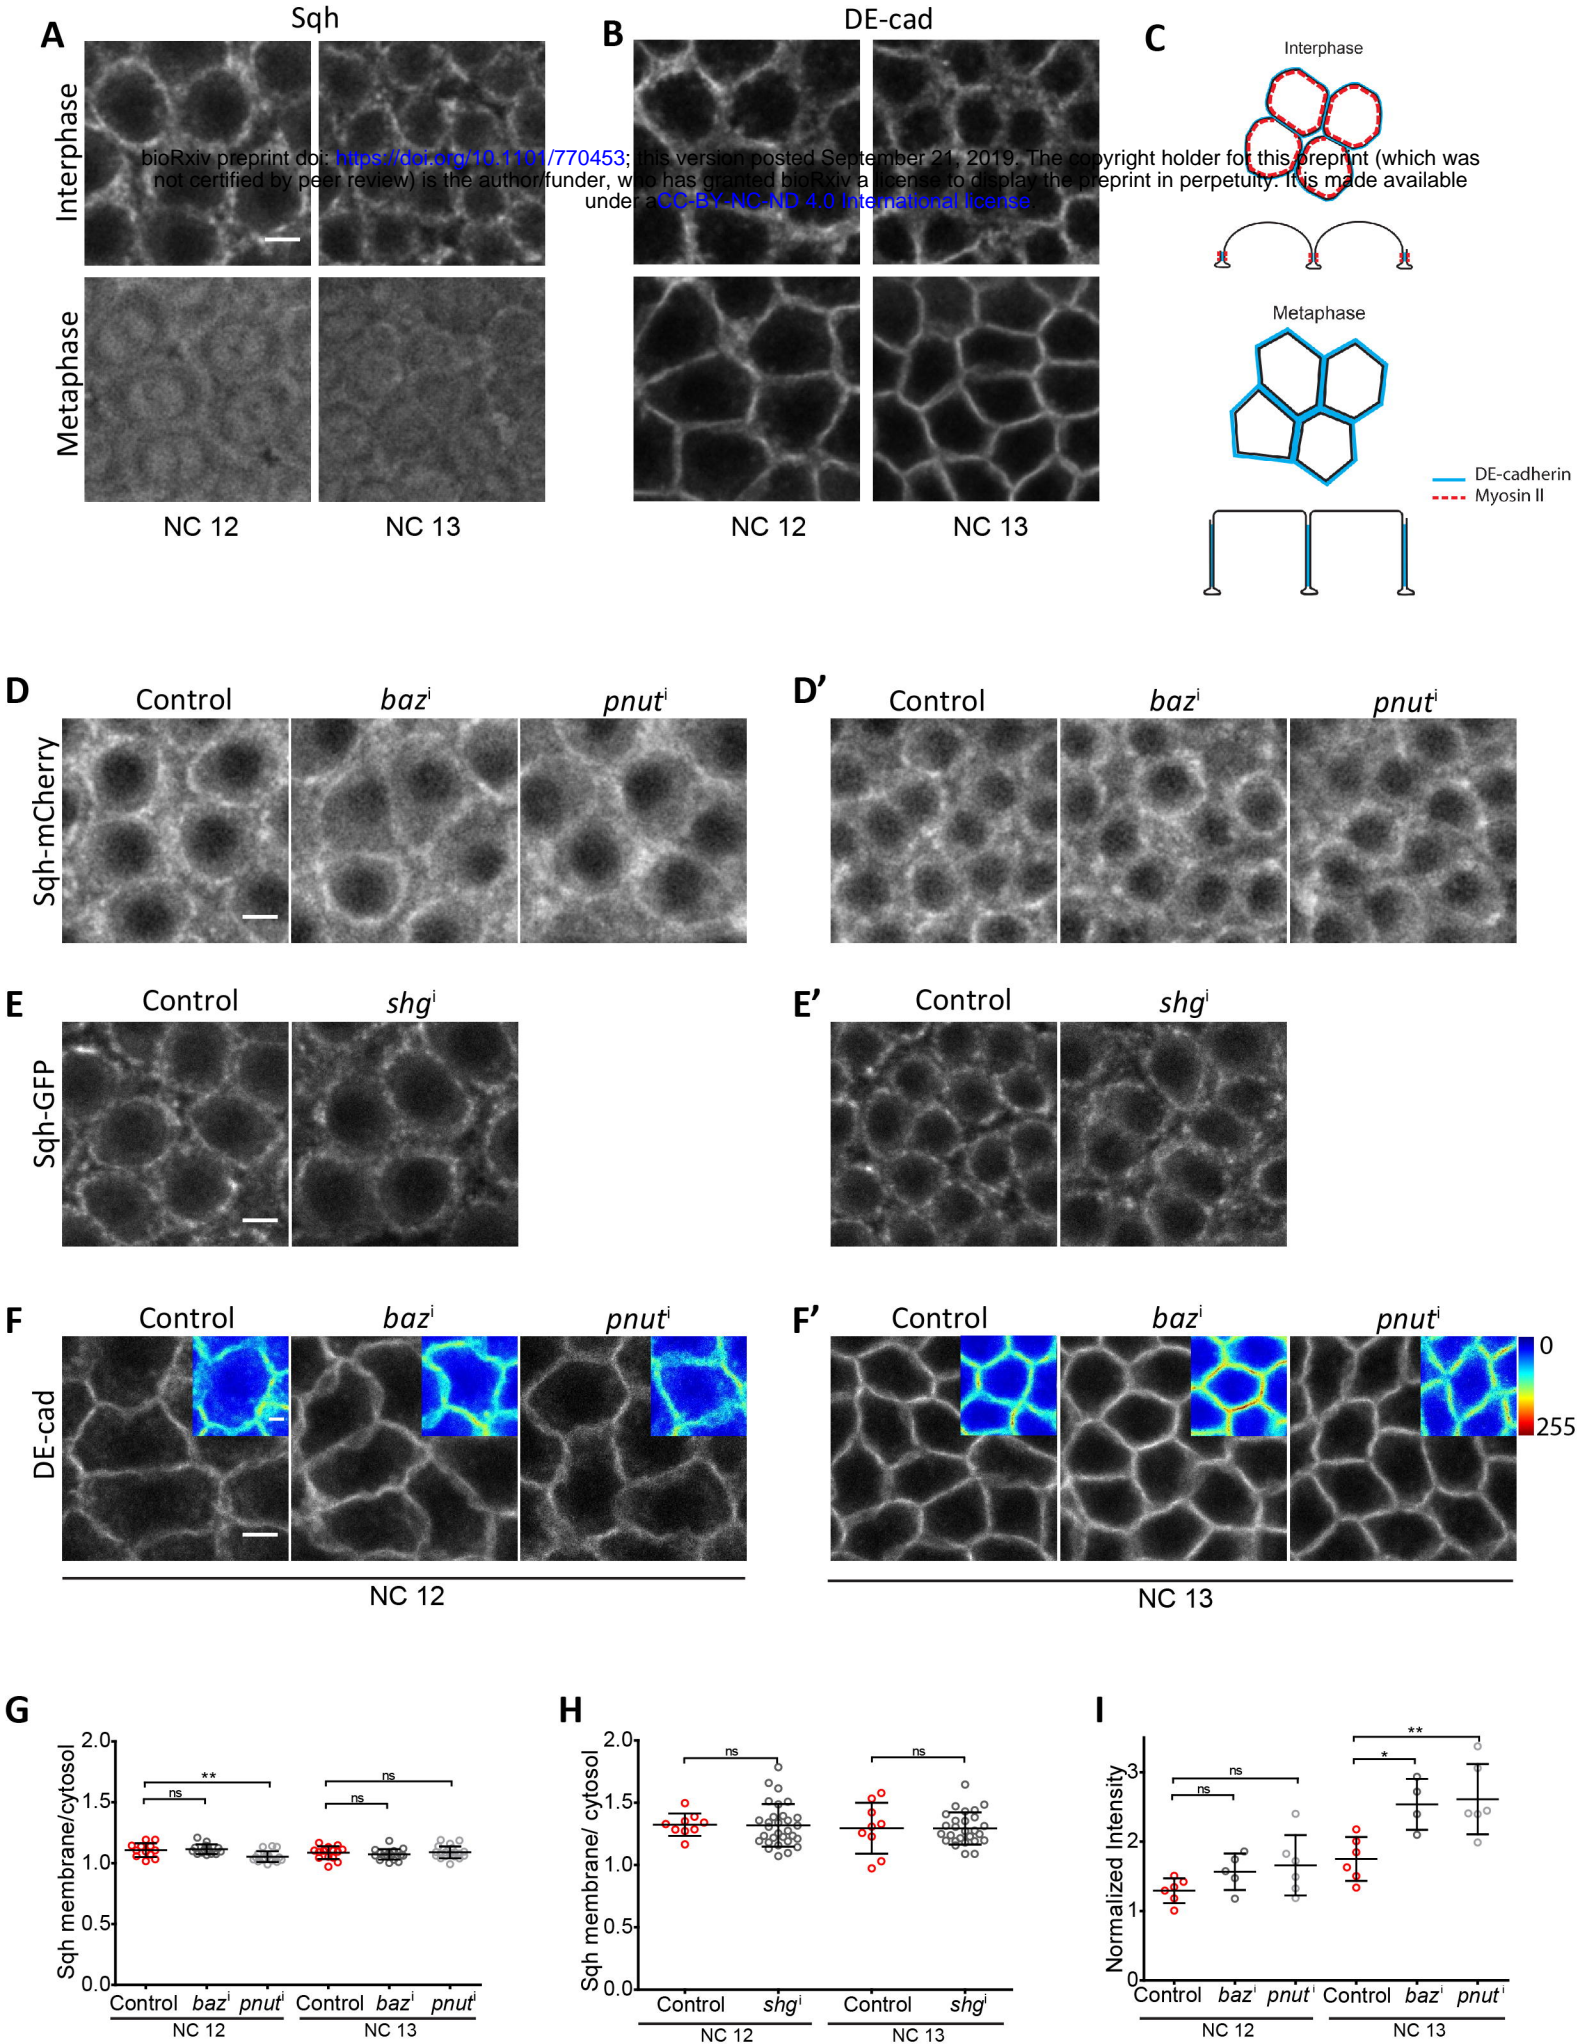

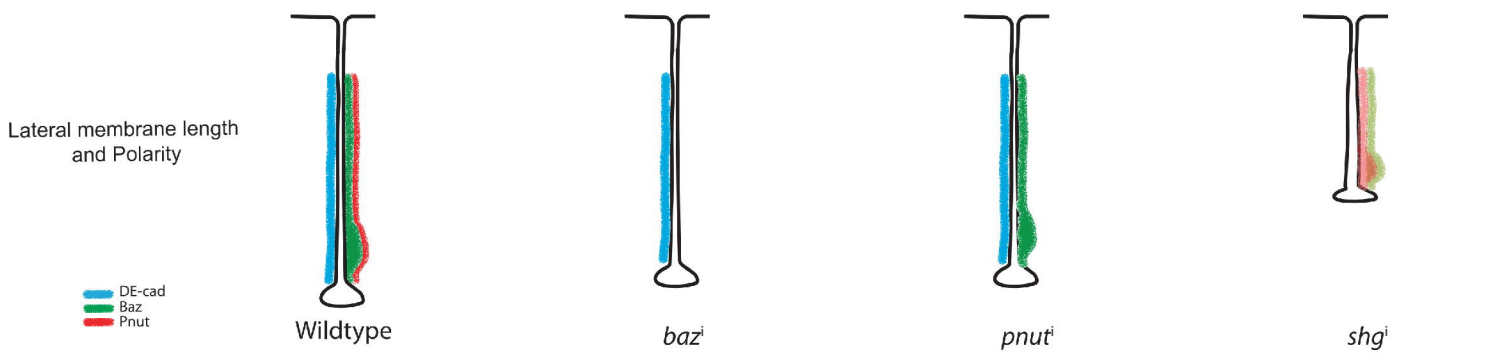

Source: http://biorxiv.org/content/10.1101/770453v1.full.pdf
